1 **Manuscript Title:**

2

3 **RAD54 is essential for RAD51-mediated repair of meiotic DSB in Arabidopsis.**

4

5

6 Miguel Hernandez Sanchez-Rebato, Alida M. Bouatta, Maria E. Gallego, Charles I. White\*

7 and Olivier Da Ines\*.

8

9 Institut Génétique Reproduction et Développement (GReD), Université Clermont Auvergne, UMR 6293

10 CNRS, U1103 INSERM, F-63000 Clermont-Ferrand, France

11

12

13 Short title: RAD51 and RAD54 in meiotic recombination in Arabidopsis

14

15

16 \*Corresponding author: Email: [Olivier.da\\_ines@uca.fr](mailto:Olivier.da_ines@uca.fr); Email: [charles.white@uca.fr](mailto:charles.white@uca.fr)

17

18

19

20

## 21 **Abstract**

22           An essential component of the homologous recombination machinery in eukaryotes,  
23 the RAD54 protein is a member of the SWI2/SNF2 family of helicases with dsDNA-dependent  
24 ATPase, DNA translocase, DNA supercoiling and chromatin remodelling activities. It is a motor  
25 protein that translocates along dsDNA and performs multiple functions in homologous  
26 recombination. In particular, RAD54 is an essential cofactor for regulating RAD51 activity. It  
27 stabilizes the RAD51 nucleofilament, remodels nucleosomes, and stimulates homology search  
28 and strand invasion activity of RAD51. Accordingly, deletion of RAD54 has dramatic  
29 consequences on DNA damage repair in mitotic cells. In contrast, its role in meiotic  
30 recombination is less clear.

31           RAD54 is essential for meiotic recombination in *Drosophila* and *C. elegans*, but plays  
32 minor roles in yeast and mammals. We present here characterization of the roles of RAD54 in  
33 meiotic recombination in the model plant *Arabidopsis thaliana*. Absence of RAD54 has no  
34 detectable effect on meiotic recombination in otherwise wild-type plants but RAD54 becomes  
35 essential for meiotic DSB repair in absence of DMC1. In *Arabidopsis*, *dmc1* mutants have an  
36 achiasmate meiosis, in which RAD51 repairs meiotic DSBs. Absence of RAD54 in *dmc1*  
37 mutants leads to meiotic chromosomal fragmentation. The action of RAD54 in meiotic RAD51  
38 activity is thus downstream of the role of RAD51 in supporting the activity of DMC1. Equivalent  
39 analyses show no effect on meiosis of combining *dmc1* with the mutants of the RAD51-  
40 mediators RAD51B, RAD51D and XRCC2.

41           RAD54 is thus required for repair of meiotic DSBs by RAD51 and the absence of  
42 meiotic phenotype in *rad54* plants is a consequence of RAD51 playing a RAD54-independent  
43 supporting role to DMC1 in meiotic recombination.

44

45

46

## 47 **Author Summary**

48 Homologous recombination is a universal pathway which repairs broken DNA molecules  
49 through the use of homologous DNA templates. It is both essential for maintenance of genome  
50 stability and for the generation of genetic diversity through sexual reproduction. A central step  
51 of the homologous recombination process is the search for and invasion of a homologous  
52 intact DNA sequence that will be used as template. This key step is catalysed by the RAD51  
53 recombinase in somatic cells and RAD51 and DMC1 in meiotic cells, assisted by a number of  
54 associated factors. Among these, the chromatin-remodelling protein RAD54 is a required  
55 cofactor for RAD51 in mitotic cells. Understanding of its role during meiotic recombination  
56 however remains elusive. We show here that RAD54 is required for repair of meiotic double  
57 strand breaks by RAD51 in the plant *Arabidopsis thaliana*, and this function is downstream of  
58 the meiotic role of RAD51 in supporting the activity of DMC1. These results provide new  
59 insights into the regulation of the central step of homologous recombination in plants and very  
60 probably also other multicellular eukaryotes.

61

## 62 Introduction

63 Homologous recombination (HR) is a universally conserved DNA repair mechanism essential  
64 for maintaining genomic integrity and ensuring genetic diversity [1, 2]. In somatic cells, HR is  
65 used to repair DNA breaks caused by environmental and endogenous factors and is critical in  
66 the recovery of stalled and collapsed replication forks. In meiotic cells of the majority of studied  
67 eukaryotes, HR is essential for accurate chromosome segregation during the first meiotic  
68 division, also generating genetic diversity among meiotic products [3, 4].

69 Homologous recombination is a DNA repair pathway that involves the use of a  
70 homologous template for restoration of the original sequence. It is initiated by DNA double-  
71 strand breaks (DSBs) and subsequent resection of the 5'-ended strands of the DSB,  
72 generating long 3' single-stranded DNA (ssDNA) overhangs [5]. The ssDNA overhangs are  
73 further coated by replication protein A (RPA) protecting them from nucleases and removing  
74 secondary structures. In a subsequent step, RPA is displaced by the recombinase RAD51 in  
75 somatic cells, or RAD51 and DMC1 in meiotic cells, forming a right-handed helical  
76 nucleofilament on the exposed single-stranded DNA (ssDNA) flanking the DSB [6, 7]. This  
77 helical nucleofilament performs the homology search and catalyses the invasion of a  
78 homologous DNA template sequence by the 3'-ended DNA strands, which are then extended  
79 through DNA synthesis. The resulting joint recombination intermediate can be processed  
80 through several different pathways eventually leading to separation of the recombining DNA  
81 molecules and restoration of chromosome integrity [1, 2].

82 The nucleoprotein filament is the active protein machinery for DNA homology search  
83 and strand exchange during HR. In somatic cells, the nucleoprotein filament is formed by the  
84 RAD51 recombinase. The *in vivo* assembly and disassembly of the RAD51 nucleoprotein  
85 filament is a highly dynamic process, regulated via the coordinated actions of various positive  
86 and negative factors, and notably, the RAD51 mediators [8, 9]. These proteins, involved in the  
87 regulation of the formation, stability and activity of the RAD51 nucleofilament, include the  
88 RAD51 paralogues and the SHU complex that are known to be essential RAD51 positive

89 regulators (for reviews see [8-11]. The RAD51 paralogues are important for homologous  
90 recombination and DNA repair in somatic cells [9, 12]. In contrast, clear understanding of their  
91 roles during meiosis remains elusive. Budding yeast has two RAD51 paralogues, Rad55 and  
92 Rad57, which form a heterodimer, and are essential for meiotic recombination [13-15] and 4  
93 Shu proteins (Psy3, Csm2, Shu1 and Shu3) forming the Shu/PCSS complex that is also  
94 required for Rad51 filament assembly and meiotic recombination [16]. Vertebrates, like  
95 *Arabidopsis thaliana*, have five RAD51 paralogues (in addition to DMC1): RAD51B, RAD51C,  
96 RAD51D, XRCC2 and XRCC3 which form different complexes [8-11]. Vertebrate mutants for  
97 any of the RAD51 paralogues are embryonic lethal and this has hampered the study of their  
98 meiotic phenotypes. Nevertheless, a number of studies have demonstrated that RAD51C and  
99 XRCC3 are essential for meiotic recombination both in vertebrates and plants [17-27]. In  
100 contrast, the possible meiotic roles of RAD51B, RAD51D and XRCC2 are less clearly  
101 understood. These three genes are highly expressed in meiotic tissues in animals [28-30] and  
102 plants [31-33]. In humans, mutation in XRCC2 has been linked to meiotic arrest, azoospermia  
103 and infertility [34] and absence of RAD51B or RAD51D lead to meiotic defects in the moss  
104 *Physcomitrella patens* and rice, respectively [35-37]. The *Arabidopsis xrcc2* mutant and, to a  
105 lesser extent *rad51b*, have been associated with increased meiotic recombination rates, but  
106 all three mutants are fully fertile and present no detectable meiotic defects [24, 38-40].  
107 Vertebrate genomes also encode two Shu-related proteins, SWS1-SWSAP1, which form a  
108 complex dispensable for mouse viability but essential for meiotic progression [41]. To date,  
109 Shu proteins have not been identified in plants.

110 RAD51 nucleofilament activity is further supported by the highly conserved RAD54  
111 protein, which belongs to the SWI2/SNF2 DNA helicase family. It is a dsDNA-dependent  
112 ATPase that uses energy from ATP hydrolysis to translocate along dsDNA. It is thus a motor  
113 protein and performs multiple functions in homologous recombination. In particular, RAD54 is  
114 an essential cofactor stimulating RAD51 activity. It has been shown to stabilize the RAD51  
115 nucleofilament, remodel nucleosomes, stimulate homology search and strand invasion activity  
116 of RAD51, dissociate bound RAD51 after completion of strand exchange and even to catalyse

117 branch migration [42-44]. Accordingly, deletion of RAD54 has dramatic consequences on DNA  
118 damage repair in mitotic cells (For reviews see [42-44]).

119         The role of RAD54 in meiotic recombination is less clear. In *Drosophila* and *C. elegans*,  
120 which exclusively rely on RAD51 (not DMC1), RAD54 is essential for meiotic recombination  
121 [45-47]. Yet, in most eukaryotes, meiotic HR is mediated by RAD51 and the meiosis-specific  
122 DMC1 [6, 48]. Interestingly however, while RAD51 is essential for homology search and strand  
123 invasion in mitotic cells, it only plays an accessory role for DMC1 in meiosis [49, 50]. Thus,  
124 DMC1 is the active meiotic recombinase but requires the support of RAD51 to function [49,  
125 50]. Accordingly, data from budding yeast have demonstrated that Rad51 activity is  
126 downregulated during meiosis to favour Dmc1 catalysing DNA strand-exchange using the  
127 homologous chromosome as a template [49, 51-54].

128         In yeast, down-regulation of Rad51 activity is mediated by the coordinated  
129 phosphorylation of Hed1 and the Rad51-cofactor Rad54 by the meiosis-specific kinase Mek1  
130 [51-57]. Hed1 is a meiosis-specific protein that binds to Rad51, impeding access of Rad54 and  
131 thereby restricting activity of Rad51 nucleofilaments in meiosis [52, 55, 56, 58].  
132 Phosphorylation of Rad54 by Mek1 also reduces its affinity for Rad51 [51, 59]. Thus, both  
133 pathways downregulate Rad51 through inhibition of Rad51-Rad54 complex formation and this  
134 in turns favour Dmc1-dependent inter-homologue recombination. In accordance with this  
135 down-regulation, Rad54 is also not essential for Dmc1 activity and plays a relatively minor role  
136 in meiotic recombination in budding yeast [60-66]. This is however due to the presence of a  
137 second, Dmc1-specific Rad54 homologue, Rdh54/Tid1 [62, 64-66]. Biochemical and genetic  
138 experiments have demonstrated that Rdh54 preferentially acts with Dmc1 to promote inter-  
139 homologue recombination whereas Rad54 preferentially stimulates Rad51-mediated strand  
140 invasion for sister chromatid repair of excess DSBs [60, 61, 64, 67, 68].

141

142         In mouse, two RAD54 homologues, RAD54 and RAD54B, have been identified. Both  
143 are required for somatic recombination but neither is essential for meiotic recombination as  
144 single and double mutant mice are fertile, although RAD54 may be needed for normal

145 distribution of RAD51 on meiotic chromosomes [69, 70]. To date in plants, only one RAD54  
146 orthologue has been characterized (*Arabidopsis* locus AT3G19210). As in yeast and  
147 mammals, *Arabidopsis* RAD54 is essential for RAD51-mediated recombination in somatic  
148 cells. Absence of RAD54 leads to DNA damage hypersensitivity, strong reduction in  
149 homologous recombination efficiency and defects in pairing of homologous loci following DSB  
150 formation [71-76]. However, beyond the fact that *Arabidopsis rad54* plants are fertile, a role for  
151 RAD54 in *Arabidopsis* meiotic recombination has not been assessed. Given its essential role  
152 in RAD51-nucleofilament activity and its expression in meiocytes [32, 33] we hypothesized that  
153 RAD54 may also play an important role in meiotic recombination in plants.

154 Here, we present a detailed analysis of RAD54 function in meiotic recombination in  
155 *Arabidopsis*. Our data show that absence of RAD54 has no detectable effect on meiotic  
156 recombination in otherwise wild-type plants, but that RAD54 becomes essential for meiotic  
157 DSB repair in absence of DMC1. In *Arabidopsis dmc1* mutants, RAD51 repairs meiotic DSBs  
158 but does not produce chiasmata and absence of RAD54 in *dmc1* mutants leads to massive  
159 chromosome fragmentation (a "*rad51*-like" phenotype). RAD51 immunolocalization confirms  
160 that meiotic RAD51 nucleofilaments are formed (but non-productive) in *dmc1 rad54* double  
161 mutants. Strikingly, similar analyses show no effect on meiosis of combining *dmc1* with the  
162 mutants of the RAD51-mediators RAD51B, RAD51D and XRCC2.

163 Altogether our data demonstrate that RAD54 is required for RAD51-dependent repair  
164 of meiotic DSBs in *Arabidopsis* in the absence of DMC1. The absence of detectable meiotic  
165 phenotype in *rad54* plants is thus a consequence of RAD51 playing only a supporting, non-  
166 catalytic role in meiotic recombination and this role is RAD54-independent. Our findings have  
167 several interesting implications for the regulation of the strand invasion step during meiotic  
168 recombination in *Arabidopsis*, which are further discussed.

169

170

## 171 **Results**

### 172 **RAD54 is essential for somatic DNA repair**

173 RAD54 is instrumental for homologous recombination in both mitotic and meiotic cells in many  
174 organisms (see above). In plants, previous analyses have also demonstrated a role of RAD54  
175 in RAD51-mediated DSB repair in somatic cells, while the observation that *rad54-1*  
176 Arabidopsis mutant plants are fertile showed that the RAD54 protein does not play an essential  
177 role in Arabidopsis meiosis [71-76]. However, the existence of more subtle evidence for meiotic  
178 roles of RAD54 has not yet been assessed in plants. In addition to using the previously  
179 characterised *rad54-1* allele, we have characterised a second RAD54 T-DNA insertion allele  
180 (SALK\_124992), which we have named *rad54-2* (Figure 1A). The exact genomic structure of  
181 the T-DNA insertion in the *rad54-2* allele was verified by PCR and sequencing (Figure 1A) and  
182 homozygous mutant lines were analysed by RT-PCR to confirm the absence of the respective  
183 transcripts (Figure 1B). In *rad54-2*, the T-DNA is inserted in exon 4 of the *RAD54* gene. This  
184 insertion is flanked by T-DNA LB sequences in opposite orientations and is associated with a  
185 deletion of 11 bp of the *RAD54* exon 4 sequence (Figure 1A). No transcript was detected with  
186 primers spanning the T-DNA insertion site, confirming the absence of full-length transcript  
187 (Figure 1B), although as commonly observed in the insertions, a transcript could be detected  
188 in *rad54-2* downstream of the T-DNA insertion. Sequence analysis showed that an in-frame  
189 stop codon is present in the upstream T-DNA left border, 24 bp after the chromosome-T-DNA  
190 junction (Figure 1A). Thus, a protein of the first 285 amino acids (out of 910) of RAD54 fused  
191 to 8 amino acids translated from the first 24 nt of the T-DNA LB could potentially be expressed  
192 from the *rad54-2* allele. If present, this protein would lack all of the described essential domains  
193 for RAD54 activity.

194 The *rad54-1* and *rad54-2* plants were used to confirm the role of RAD54 in DSB repair and  
195 homologous recombination in somatic cells by testing the sensitivity of the mutants to the DNA  
196 damaging agent Mitomycin C (MMC; Figure 1C-D). MMC is known to form DNA interstrand  
197 cross-link adducts, which produce DNA strand breaks *in vivo*. The importance of homologous



198 recombination in the repair of DNA cross-links has led to the use of MMC hypersensitivity as  
199 a test for HR capacity in a number of organisms. In Arabidopsis, this is seen in the MMC  
200 hypersensitivity of many homologous recombination-deficient mutants [24, 26, 50, 74, 77]. As  
201 previously shown, *rad54-1* plants display clear hypersensitivity to MMC [74] (Figure 1C and  
202 D). MMC hypersensitivity is also seen in *rad54-2* plants, particularly visible at MMC doses of  
203 30 and 40  $\mu$ M (Figure 1C and D) and confirming the importance of RAD54 in homologous  
204 recombination in somatic cells.

205

### 206 **Absence of RAD54 does not affect meiotic progression**

207 Meiotic defects are usually reflected in reduced fertility and thus in a reduction in seed number  
208 in Arabidopsis [78]. We thus monitored number of seeds per silique in our two *rad54* mutant  
209 lines and found, as expected, no fertility defects in either *rad54-1* or *rad54-2* (Figure S1). The  
210 mean seed number per silique was 56 seeds per silique for both *rad54-1* (n = 40 siliques) and  
211 *rad54-2* (n = 80), while wild-type siliques contained on average 58 seeds per silique (n = 40  
212 for RAD54-1 and n = 60 for RAD54-2) (Figure S1). These small differences are not statistically  
213 significant ( $p > 0.05$ ; unpaired, two-tailed Mann-Whitney test). In agreement with previous  
214 results [74], this confirms that RAD54 is not instrumental for meiosis in plants, notwithstanding  
215 its importance in somatic recombination. This conclusion was further supported through  
216 cytogenetic analyses of 4',6-diamidino-2-phenylindole (DAPI) stained chromosomes through  
217 male meiosis. Wild-type Arabidopsis meiosis has been well described and the major stages  
218 are shown in Figure 2. During prophase I, meiotic chromosomes condense, pair, recombine  
219 and undergo synapsis. Full synapsis of homologues is seen at pachytene (Figure 2A).  
220 Chromosomes further condense and five bivalents (two homologous chromosomes attached  
221 by sister chromatid cohesion and chiasmata) are visible at metaphase I (Figure 2B). Each  
222 chromosome then separates from its homologue, leading to the formation of two groups of five  
223 chromosomes easily visualised at metaphase II (Figure 2C). Meiosis II proceeds and gives  
224 rise to 4 balanced haploid nuclei (Figure 2D). In *rad54* mutants, meiotic stages appear

225 indistinguishable from the wild-type, resulting in the expected 4 haploid meiotic products  
226 (Figure 2E to L). Thus, meiotic progression is not affected by absence of RAD54.

227

### 228 **Absence of RAD54 does not affect crossover recombination rate and interference**

229 We next sought to analyse more closely the impact of RAD54 on meiotic recombination by  
230 measuring meiotic CO rates in genetic intervals marked by transgenes encoding fluorescent  
231 marker proteins expressed in pollen (FTLs; [79, 80]). Combined with mutation of the  
232 *QUARTET1* gene (*qrt*) which prevents separation of the four pollen grains [81], these FTL lines  
233 permit direct measurement of recombination between the linked fluorescent markers by  
234 scoring tetrad pollen fluorescence [79, 80]. We determined CO rates in two adjacent intervals  
235 on chromosomes 1 (I1b and I1c) and 2 (I2f and I2g) in wild-type and *rad54-2* mutant plants. In  
236 wild-type plants, I1b (1.8 Mb) spans 10.3 cM and I1c (4.1 Mb) 22.2 cM (Figure 3 and Table  
237 S1). No difference in recombination frequency was observed for either interval in *rad54-2*  
238 mutants with 9 cM and 22.7 cM for I1b and I1c, respectively (Figure 3 and Table S1). Analyses  
239 of two additional intervals, I2f (0.7 Mb) and I2g (0.4 Mb), on chromosome 2 confirmed this  
240 result, with no significant difference in recombination frequency observed between the wild-  
241 type and *rad54-2* mutants (6.8 cM to 6.9 cM for I2f and 4.3 cM to 4.9 cM for I2g; Figure 3 and  
242 Table S1). We obtained similar results for *rad54-1* mutant plants with 6.5 cM and 4.7 cM in I2f  
243 and I2g, respectively (Supplemental Figure S2 and Table S1). In accordance with these  
244 results, we found a similar interference ratio (IR) in wild-type plants and *rad54* mutants for both  
245 intervals (IR I1bc : 0.35 in wild-type and 0.36 in *rad54-2*; IR I2fg : 0.9 in wild-type, 1 in *rad54-1*  
246 and 1 in *rad54-2*;  $p > 0.05$ , z-test).

247 Thus, absence of RAD54 does not affect meiotic CO rates in at least 4 different intervals on 2  
248 chromosomes. These results were further confirmed genome-wide through counting  
249 chiasmata in metaphase I of wild-type, *rad54-1* and *rad54-2* male meiocytes, which show  
250 means of 9.6 (SD = 1.3; n = 19), 9.6 (SD = 1.5; n = 25) and 9.1 (SD=1; n=19) chiasmata per  
251 meiosis, respectively ( $p > 0.05$ , unpaired two-tailed t-tests).

252

253 **RAD54 is essential for RAD51-dependent repair of meiotic DSB in absence of DMC1**

254 These data confirm that RAD54 is not required for meiotic recombination in Arabidopsis, an a  
255 *priori* surprising conclusion given the importance of RAD54 in homologous recombination (see  
256 Introduction). Data from budding yeast have shown that RAD54 is not essential for meiotic  
257 recombination in presence of DMC1 and the DMC1-specific RAD54 homologue Rdh54 (Tid1)  
258 [51, 61, 64-66]. Instead, interaction of RAD54 with RAD51 is constrained during meiotic  
259 recombination in yeast and this represents a key point in the mechanisms leading to  
260 downregulation of RAD51 activity in meiosis [51, 58]. The RAD51-RAD54 pathway however  
261 becomes essential for sister chromatid repair in absence of DMC1 [60, 61]. We thus  
262 hypothesized that RAD54 may be essential for RAD51-mediated repair of meiotic DSB in  
263 Arabidopsis. To test this hypothesis, we analysed meiosis in the absence of DMC1. Meiosis in  
264 Arabidopsis *dmc1* mutants has been well described [82, 83] and the major stages are  
265 summarized in Figure 4. Absence of DMC1 leads to asynapsis and lack of CO. However intact  
266 univalents are observed in metaphase I owing to DSB repair by RAD51, most probably using  
267 sister chromatid (Figure 4E to H).

268 Analyses of *dmc1 rad54* double mutants show massive chromosome fragmentation in *dmc1*  
269 *rad54* double mutants (Figure 4I to P), similar to that seen in *rad51* mutants (Figure 4Q to T).  
270 Thus, RAD51-dependent meiotic HR repair indeed depends upon the presence of RAD54  
271 (Figure 4I to P). This effect is confirmed by the significant reduction of fertility caused by the  
272 absence of RAD54 in *dmc1* mutant plants (Figure S3). Accordingly, we propose that the  
273 absence of meiotic phenotype in *rad54* plants is a consequence of RAD51 playing only a  
274 RAD54-independent, non-catalytic role in supporting meiotic recombination by DMC1.

275

276 **Absence of RAD54 blocks RAD51 catalytic activity rather than RAD51 focus formation**

277 RAD54 is an essential cofactor for regulating RAD51 activity and has been implicated in both  
278 early and late steps of the HR pathway (see Introduction). Our data show that RAD54 is  
279 required for repair of meiotic DSB by RAD51 in Arabidopsis and the fact that RAD54 is not  
280 required in the presence of DMC1 suggests that the RAD54-dependence of RAD51 is

281 downstream of that of the RAD51 nucleofilament in supporting DMC1 activity. To confirm the  
282 RAD54-independence of RAD51-nucleofilament formation in meiosis, we quantified meiotic  
283 RAD51 focus formation as a proxy for RAD51 nucleofilament formation in these plants. We  
284 performed co-immunolocalization of RAD51 and the axis protein, ASY1, in wild-type, *rad54*,  
285 *dmc1*, and *dmc1 rad54* meiocytes and counted the number of RAD51 foci throughout early  
286 prophase I (Figure 5). In wild-type meiocytes, we observed a mean of  $91 \pm 5$  RAD51 foci ( $\pm$   
287 S.E.M,  $n = 35$ ). Similar numbers of RAD51 foci were observed in *rad54* ( $88 \pm 6$ ,  $n = 9$ ) and  
288 *dmc1* ( $97 \pm 3$ ,  $n = 50$ ) single mutant plants and importantly, the numbers of RAD51 foci were  
289 also unchanged in *dmc1 rad54* double mutants ( $94 \pm 2$ ,  $n = 56$ ) (Figure 5). RAD51  
290 nucleofilaments are still formed in the *dmc1 rad54* double mutants but are not productive.  
291 Hence, RAD54 acts downstream of RAD51 nucleofilament formation and its role must be in  
292 the activity of the nucleofilament, presumably in facilitating invasion of the donor DNA duplex  
293 [84]. We note also that this result concords with that fact that RAD54 is not needed for the  
294 essential role of the RAD51 nucleofilament in supporting DMC1 activity in meiotic HR.

295

### 296 **RAD51-dependent repair of meiotic DSB does not require RAD51 paralogues RAD51B,** 297 **RAD51D and XRCC2**

298 RAD51 nucleofilament activity is also extensively regulated by the RAD51 paralogues (see  
299 Introduction). In Arabidopsis, RAD51C and XRCC3 are essential for meiotic recombination,  
300 with absence of either leading to massive chromosome fragmentation [22-24, 26, 27]. In  
301 contrast, the roles of RAD51B, RAD51D and XRCC2 in meiosis are less clear and their  
302 absence does not lead to any obvious visible meiotic defects [24, 39, 40]. They are however  
303 expressed in meiotic tissues [31-33] and we have previously reported an increased meiotic  
304 recombination rate in Arabidopsis *xrcc2* (and to a lesser extent *rad51b*) mutants in two genetic  
305 intervals [39], suggesting potential roles for these paralogues during meiosis.

306 It thus appears possible, in analogy to RAD54 (above), that the absence of visible meiotic  
307 phenotype in *rad51b*, *rad51d* or *xrcc2* mutants could simply be a consequence of RAD51  
308 strand-invasion activity not being required for meiotic recombination in the presence of DMC1.

309 We thus sought to test the impact of RAD51 paralogues in RAD51-dependent meiotic DSB  
310 repair by analysing meiotic progression in their absence in a *dmc1* mutant background (Figure  
311 6). As described above, *dmc1* mutants are characterized by strong synaptic defects and lack  
312 of CO (Figure 6A-C). However, meiotic DSB are still repaired as seen in the presence of intact  
313 achiasmate univalents at metaphase I (Figure 6B), that segregate randomly at anaphase I  
314 (Figure 6C). These analyses did not show any detectable effects of the absence of RAD51B,  
315 RAD51D or XRCC2 in the *dmc1* mutant background (Figure 6D to L). In contrast, the expected  
316 chromosome fragmentation is observed in *xrcc3* mutant meiosis [26] and this is not affected  
317 by the additional absence of DMC1 (Figure 6M-O). Thus, despite being expressed in meiotic  
318 cells and playing key roles in RAD51 activity in somatic cells, RAD51B, RAD51D and XRCC2  
319 are not required for RAD51-dependent meiotic DSB repair in Arabidopsis.

320

321

## 322 **Discussion**

323 Here, we provide evidence that Arabidopsis RAD54 is essential for meiotic double-strand  
324 break repair mediated by RAD51. This requirement for RAD54 is not observed in the presence  
325 of DMC1 as (all?) meiotic DSBs are repaired by DMC1 with RAD51 playing a supporting role  
326 to DMC1 in this process [49, 50, 59]. In the absence of DMC1 however, RAD51 catalyses the  
327 repair of meiotic DSB, leading to segregation of intact univalent chromosomes at meiotic  
328 anaphase I. Thus, absence of Arabidopsis RAD54 has no detectable effect on meiotic  
329 recombination in otherwise wild-type plants, but becomes essential for RAD51-dependent  
330 meiotic DSB repair in the absence of DMC1.

331

332 That this effect is not simply a reflection of a "mitotic" RAD51-dependent recombination context  
333 in *dmc1* meiosis is seen in the results of equivalent analyses with three RAD51 paralogue  
334 proteins, XRCC2, RAD51B and RAD51D, essential positive regulators of homologous  
335 recombination in somatic cells (reviewed in [9-11]). Mutants of these key RAD51-mediator

336 proteins have no detectable meiotic phenotypes, beyond a mild meiotic hyper-rec phenotype  
337 reported for *xrcc2* and *rad51b* plants [24, 39, 40]. We report here that their absence does not  
338 visibly alter the meiotic phenotype of *dmc1* plants. Thus, in striking contrast to RAD54, the  
339 RAD51 paralogues RAD51B, RAD51D and XRCC2 are not required for RAD51-dependent  
340 meiotic DSB repair in Arabidopsis, despite being expressed in meiotic cells and playing key  
341 roles in somatic RAD51 activity.

342

343 RAD54 is a required cofactor for RAD51 activity and is thus instrumental for both mitotic and  
344 meiotic recombination in organisms lacking the meiosis-specific recombinase DMC1 [45-47].  
345 The role of RAD54 in meiosis is however less clear in organisms expressing DMC1. Studies  
346 in budding and fission yeast have shown that Rad54 plays a relatively minor role in meiotic  
347 recombination [60-66]. This is however due to the presence of a second RAD54 homologue,  
348 Rdh54/Tid1. While both *rad54* and *rdh54* mutants form viable spores (albeit at reduced  
349 frequency), the *rad54 rdh54* double mutant rarely produces spores and is severely defective  
350 in meiotic recombination [62, 64-66]. These data reveal overlapping roles of Rad54 and  
351 Rdh54/Tid1 in meiotic recombination. In addition, Rdh54 preferentially acts with Dmc1 to  
352 promote inter-homologue recombination, whereas Rad54 preferentially stimulates Rad51-  
353 mediated strand invasion for sister chromatid repair [60, 61, 64, 68]. It is thus suggested that  
354 Rad54 is involved with Rad51 in sister chromatid repair of residual meiotic DSBs and this is in  
355 accordance with the recent demonstration of Rad51 being essential only to support Dmc1 and  
356 to repair residual DSBs after IH recombination is complete [49, 67, 85, 86].

357 In multicellular eukaryotes, evidence for a role of RAD54 homologues in meiosis however  
358 remains to be demonstrated. Mammals have two known RAD54 family members, RAD54 and  
359 RAD54B, neither of which appear to have important functions in meiosis, as mice lacking  
360 RAD54, RAD54B or both exhibit no, or only minor meiotic recombination defects [69, 70]. Our  
361 data demonstrate that RAD54 is essential for RAD51-mediated repair of meiotic DSBs in *dmc1*  
362 Arabidopsis. To our knowledge this is the first evidence of a clear meiotic role of RAD54 in a  
363 DMC1-expressing multicellular eukaryote. In Arabidopsis *dmc1* mutants, DSBs are repaired

364 without formation of inter-homologue CO and this concords with the suggestion that RAD51  
365 repairs meiotic DSB using the sister chromatid template [82, 83, 87]. Although this essential  
366 role is only observed in the absence of DMC1, we cannot exclude that the RAD51/RAD54 DSB  
367 repair pathway is also active (albeit weakly) in wild-type plants, possibly to repair excess DSBs  
368 as has been shown in yeast [60, 61]. Whether this pathway also exists in wild-type plants,  
369 remains however to be demonstrated.

370

371 Another conclusion inferred from our data is that Arabidopsis RAD54 is not necessary for  
372 DMC1 activity, either alone or as a RAD51 cofactor. That absence of RAD54 has no detectable  
373 effect on meiotic recombination in the presence of DMC1 tells us that RAD51's function as an  
374 essential accessory factor for DMC1 is RAD54-independent. This conclusion concords with  
375 the reported absence of interaction between Arabidopsis RAD54 and DMC1 [74]. Yet, the  
376 DMC1 nucleofilament must perform homology search and strand invasion and this requires  
377 ATP-dependent DNA translocases (reviewed in [42, 44, 88]). We thus hypothesize that there  
378 exists a second, as yet unknown, DMC1-specific RAD54 homologue in plants. RAD54 is a  
379 SWI2/SNF2-remodelling factor that belongs to the SF2 helicase family, a number of which are  
380 encoded by the Arabidopsis genome [74, 76, 89], but to date only RAD54 (this work) has been  
381 found to play a role in meiosis.

382

383 Control of Rad51/Rad54 complex formation is used to downregulate Rad51 activity during  
384 meiosis in budding yeast, presumably to favour interhomolog recombination driven by Dmc1  
385 [6, 49, 53, 54, 59]. This downregulation is largely achieved through preventing Rad51/Rad54  
386 complex formation via two pathways involving two meiosis-specific proteins: the RAD51-  
387 binding protein Hed1 and the Mek1 kinase (which phosphorylates both RAD54 and Hed1) [51-  
388 53, 55, 56, 58]. Briefly, Mek1-mediated phosphorylation of RAD54 weakens RAD51-RAD54  
389 interaction [51, 53] and binding of Hed1 to RAD51 also prevents association of RAD54 [52, 53,  
390 55, 56, 58]. Interestingly, no apparent Hed1 or Mek1 orthologues have been identified in higher  
391 eukaryotes and in particular in plants. Several reports suggest that RAD51 is also down-



392 regulated in Arabidopsis meiosis [50, 82, 83, 87, 90, 91], but the evidence for this remains  
393 indirect. Thus, whether RAD51 strand exchange activity is down-regulated during meiosis in  
394 higher organisms and if so, how this is achieved, is not clear. The absence of meiotic  
395 phenotype of Arabidopsis *rad54* mutants, together with the demonstration of the RAD54-  
396 dependence of meiotic RAD51 activity (in the absence of DMC1), supports the idea of a  
397 hypothetical RAD54-dependent control of RAD51 activity through modulation of the  
398 RAD54/RAD51 interaction. It also, however, invites speculation concerning whether it is  
399 necessary to invoke such a downregulation to explain numbers of CO vs non-CO  
400 recombination events in plants, and very likely in vertebrates. Previous work has shown that  
401 DMC1 is capable of catalysing repair of all meiotic DSB in Arabidopsis in strand-invasion  
402 mutants of RAD51 [50, 90], or as shown here, by blocking RAD51 activity through the absence  
403 of RAD54. In both of these contexts, no evidence of alteration of numbers nor distribution of  
404 meiotic recombination has been found.

405

406 In conclusion, we present here an essential role for RAD54 in supporting meiotic RAD51-  
407 mediated DSB repair in the absence of DMC1 in Arabidopsis. In striking contrast, testing of  
408 three other key RAD51 mediator mutants (*rad51b*, *rad51d*, *xrcc2*) did not reveal any detectable  
409 impact on *dmc1* meiosis, notwithstanding the fact that they are, like RAD54, needed for  
410 RAD51-dependent recombination in somatic cells. This RAD54-dependent, RAD51-mediated  
411 meiotic DSB repair is thus not the reflection of a simple "mitotic-like" RAD51 DSB repair in  
412 meiocytes lacking DMC1, but points to RAD54 acting downstream of the role of the RAD51  
413 nucleofilament in supporting meiotic DMC1-mediated recombination. It will be of particular  
414 interest to further study in which context this pathway is activated in wild-type meiosis and also  
415 whether a similar pathway exists in other organisms outside the fungal taxa. Although further  
416 studies are needed to confirm whether (and how) RAD51 strand-invasion activity is  
417 downregulated during meiosis in plants, we speculate that this could be achieved through  
418 prevention of RAD54/RAD51 interaction, and/or via helicases dissociating precocious strand-  
419 invasion between sister chromatids, as has recently been shown in budding yeast [92].



## 420 **Materials and Methods**

### 421 **Plant Material and Growth Conditions**

422 All *Arabidopsis thaliana* plants used in this study were in the Columbia background. Seeds of  
423 the *rad54-2* (SALK\_124992) [93] T-DNA insertion mutant were obtained through the  
424 Nottingham Arabidopsis Stock Centre and characterised in this study. For other mutants, we  
425 used the following alleles: *rad54-1* [74], *dmc1-2* [83], *rad51-1* [94], *rad51b-1* [24], *rad51d-3* [39]  
426 and *xrcc2-1* [24]. Fluorescent-Tagged lines (FTLs) were: I1bc (FTL567-YFP/FTL1262-  
427 DsRed2/FTL992-AmCyan/*qrt1-2*), and I2fg (FTL800-DsRed2/FTL3411-YFP/FTL3263-  
428 AmCyan/*qrt1-2*) [79].

429 Seeds were stratified in water at 4°C for 2 days and grown on soil in a growth chamber. For *in*  
430 *vitro* culture, seeds were surface sterilised for 5 min with 75% Ethanol, 0.05% SDS, rinsed with  
431 95% Ethanol for 5 min and air-dried. Sterilised seeds were then sown on half-strength  
432 Murashige and Skoog (MS) medium, stratified at 4°C for 2 days and placed in a growth cabinet.  
433 All plants were grown under 16h light /8 h dark cycles at 23°C and 60% relative humidity.

434

### 435 **Molecular Characterization of *rad54-2* T-DNA Insertion Mutants**

436 The *rad54-2* (SALK\_124992) mutant was genotyped using primers P1 and P2 to detect the  
437 wild-type loci and primers P1, P2, and Lba1 (SALK T-DNA Left Border specific primer) were  
438 used to detect the T-DNA insertion allele. The junctions of the T-DNA insertion in the *RAD54*  
439 locus (AT3G19210) were amplified by PCR and verified by DNA sequencing.

440 For semi-quantitative RT-PCR, total RNA was extracted from young buds of wild-type, *rad54-1*  
441 and *rad54-2* plants using RNeasy Plant mini Kit (QIAGEN), following the manufacturer's  
442 instructions. 2 µg RNA were treated with RQ1 RNase-free DNase (Promega) followed by  
443 reverse transcription using M-MLV Reverse Transcriptase (Promega) according to the  
444 manufacturer's instructions. PCR amplifications were eventually performed in homozygous  
445 lines showing the absence of full-length *RAD54* transcripts (Figure 1).

446 Sequences of primers used for genotyping and RT-PCR are listed in Supplemental Table S1.

447

#### 448 **Mitomycin C Sensitivity Assays**

449 For the MMC sensitivity assay, seeds were surface-sterilised and sown onto solid medium  
450 (half strength Murashige and Skoog salts, 1% sucrose, 0.8% agar) supplemented with 0, 20,  
451 30 or 40 $\mu$ M Mitomycin C (SIGMA). Seeds were stratified in the dark for 2 days at 4°C,  
452 transferred to a growth cabinet and grown for two weeks. Sensitivity was then analysed in two-  
453 week-old seedlings by counting the number of true leaves as previously described [26]. Plants  
454 with more than three true leaves were considered as resistant. In each case, the number of  
455 leaves was counted on at least 25 seedlings in three to five independent experiments.

456

#### 457 **Recombination measurement using Fluorescent-Tagged Lines (FTL) tetrad analysis.**

458 We used Fluorescent Tagged Lines to estimate male meiotic recombination rates at two pairs  
459 of genetic intervals: I1bc on chromosome 1 and I2fg on chromosome 2. For each experiment,  
460 heterozygous plants for the linked fluorescent markers were generated and siblings from the  
461 same segregating progeny were used to compare the recombination frequency between  
462 different genotypes. Slides and fluorescent tetrad analysis were performed as described by  
463 Berchowitz and Copenhaver [79]. Tetrads were counted and attributed to specific classes (A  
464 to L). Genetic distances of each interval were calculated using Perkins equation as follows:  $X$   
465 =  $100[(1/2\text{Tetratype} + 3\text{Non-Parental Ditype})/n]$  in cM.

466 The Interference Ratio (IR) was calculated as described previously [79]. Briefly, for two  
467 adjacent intervals I1 and I2, two populations of tetrads are considered: those with at least one  
468 CO in I2 and those without any CO in I2. Genetic distance of I1 is then calculated for these two  
469 populations using the Perkins equation, i.e.  $X_1$  (I1 with CO in I2) and  $X_2$  (I1 without a CO in  
470 I2). The Interference Ratio is thus defined as  $IR = X_1/X_2$ . An IR ratio  $<1$  reveals the presence  
471 of interference while an IR ratio close to 1 reveals absence of interference. The Stahl Lab  
472 Online Tools was used for statistical analyses of the data.

473

#### 474 **Arabidopsis male meiotic chromosome spreads**

475 Meiotic chromosome spreads were prepared according to [95]. Whole inflorescences were  
476 fixed in ice-cold ethanol/glacial acetic acid (3:1) and stored at -20°C until further use. Immature  
477 flower buds of appropriate size were selected under a binocular microscope and incubated for  
478 75-90 min on a slide in 100µl of enzyme mixture (0.3% w/v cellulase (Sigma), 0.3% w/v  
479 pectolyase (Sigma) and 0.3% cytohelicase (Sigma)) in a moist chamber at 37°C. Each bud  
480 was then softened for 1 minute in 20 µl 60% acetic acid on a microscope slide at 45°C, fixed  
481 with ice-cold ethanol/glacial acetic acid (3:1) and air dried. Slide were mounted in Vectashield  
482 mounting medium with DAPI (1.5 µg.ml<sup>-1</sup>; Vector Laboratories Inc.).

483

#### 484 **RAD51 Immunolocalization in meiocytes**

485 Spreads of PMCs for immunolocalization of RAD51 were performed as described previously  
486 [96]. Primary antibodies used for immunostaining were: anti-ASY1 raised in guinea Pig (1:500)  
487 [97] and anti-RAD51 raised in rat (1:500) [98]. Secondary antibody: anti-rat Alexa fluor 488;  
488 anti-rat Cy3 were used at 1:100 dilution.

489

#### 490 **Microscopy**

491 All observations were made with a motorised Zeiss Axiomager.Z1 epifluorescence  
492 microscope (Carl Zeiss AG, Germany) driven by the ZEN Pro software (Carl Zeiss AG,  
493 Germany). Photographs were taken with an AxioC.am Mrm camera (Carl Zeiss AG, Germany)  
494 and Zeiss filter sets adapted for the fluorochromes used. Image stacks were captured in three  
495 dimensions (x, y, z) and further processed and adjusted for brightness and contrast on ZEN  
496 Pro and ImageJ/FIJI software. RAD51 foci were counted on collapsed z-stack projections by  
497 using counting tool of the ZEN Pro software.

498

#### 499 **Acknowledgements**

500 We thank Gregory Copenhaver and Ian Henderson for FTL lines, Chris Franklin and Peter  
501 Schlögelhofer for providing the ASY1 and RAD51 antibodies, respectively. We thank members  
502 of the recombination group for their help and discussions.

## 503 REFERENCES

- 504 1. Heyer WD, Ehmsen KT, Liu J. Regulation of homologous recombination in eukaryotes.  
505 Annu Rev Genet. 2010;44:113-39. doi: 10.1146/annurev-genet-051710-150955. PubMed  
506 PMID: 20690856.
- 507 2. Ranjha L, Howard SM, Cejka P. Main steps in DNA double-strand break repair: an  
508 introduction to homologous recombination and related processes. Chromosoma.  
509 2018;127(2):187-214. doi: 10.1007/s00412-017-0658-1. PubMed PMID: 29327130.
- 510 3. Mercier R, Mezard C, Jenczewski E, Macaisne N, Grelon M. The molecular biology of  
511 meiosis in plants. Annu Rev Plant Biol. 2015;66:297-327. doi: 10.1146/annurev-arplant-  
512 050213-035923. PubMed PMID: 25494464.
- 513 4. Hunter N. Meiotic Recombination: The Essence of Heredity. Cold Spring Harb Perspect  
514 Biol. 2015;7(12). doi: 10.1101/cshperspect.a016618. PubMed PMID: 26511629.
- 515 5. Symington LS. Mechanism and regulation of DNA end resection in eukaryotes. Crit Rev  
516 Biochem Mol Biol. 2016;51(3):195-212. doi: 10.3109/10409238.2016.1172552. PubMed  
517 PMID: 27098756.
- 518 6. Brown MS, Bishop DK. DNA strand exchange and RecA homologs in meiosis. Cold  
519 Spring Harb Perspect Biol. 2014;7(1):a016659. doi: 10.1101/cshperspect.a016659. PubMed  
520 PMID: 25475089.
- 521 7. Crickard JB, Greene EC. Biochemical attributes of mitotic and meiotic presynaptic  
522 complexes. DNA Repair (Amst). 2018;71:148-57. doi: 10.1016/j.dnarep.2018.08.018. PubMed  
523 PMID: 30195641.
- 524 8. Kowalczykowski SC. An Overview of the Molecular Mechanisms of Recombinational  
525 DNA Repair. Cold Spring Harb Perspect Biol. 2015;7(11). doi: 10.1101/cshperspect.a016410.  
526 PubMed PMID: 26525148.
- 527 9. Zelensky A, Kanaar R, Wyman C. Mediators of homologous DNA pairing. Cold Spring  
528 Harb Perspect Biol. 2014;6(12):a016451. doi: 10.1101/cshperspect.a016451. PubMed PMID:  
529 25301930.
- 530 10. Suwaki N, Klare K, Tarsounas M. RAD51 paralogs: roles in DNA damage signalling,  
531 recombinational repair and tumorigenesis. Semin Cell Dev Biol. 2011;22(8):898-905. doi:  
532 10.1016/j.semcdb.2011.07.019. PubMed PMID: 21821141.
- 533 11. Pradillo M, Varas J, Oliver C, Santos JL. On the role of *AtDMC1*, *AtRAD51* and its  
534 paralogs during Arabidopsis meiosis. Front Plant Sci. 2014;5:23. doi:  
535 10.3389/fpls.2014.00023. PubMed PMID: 24596572.
- 536 12. Liu J, Renault L, Veaute X, Fabre F, Stahlberg H, Heyer WD. Rad51 paralogues Rad55-  
537 Rad57 balance the antirecombinase Srs2 in Rad51 filament formation. Nature.  
538 2011;479(7372):245-8. doi: 10.1038/nature10522. PubMed PMID: 22020281.
- 539 13. Gasior SL, Olivares H, Ear U, Hari DM, Weichselbaum R, Bishop DK. Assembly of  
540 RecA-like recombinases: distinct roles for mediator proteins in mitosis and meiosis. Proc Natl  
541 Acad Sci U S A. 2001;98(15):8411-8. doi: 10.1073/pnas.121046198. PubMed PMID:  
542 11459983.

- 543 14. Gasior SL, Wong AK, Kora Y, Shinohara A, Bishop DK. Rad52 associates with RPA  
544 and functions with rad55 and rad57 to assemble meiotic recombination complexes. *Genes*  
545 *Dev.* 1998;12(14):2208-21. doi: 10.1101/gad.12.14.2208. PubMed PMID: 9679065.
- 546 15. Schwacha A, Kleckner N. Interhomolog bias during meiotic recombination: meiotic  
547 functions promote a highly differentiated interhomolog-only pathway. *Cell.* 1997;90(6):1123-  
548 35. PubMed PMID: 9323140.
- 549 16. Sasanuma H, Tawaramoto MS, Lao JP, Hosaka H, Sanda E, Suzuki M, et al. A new  
550 protein complex promoting the assembly of Rad51 filaments. *Nat Commun.* 2013;4:1676. doi:  
551 10.1038/ncomms2678. PubMed PMID: 23575680.
- 552 17. Serra H, Da Ines O, Degroote F, Gallego ME, White CI. Roles of XRCC2, RAD51B and  
553 RAD51D in RAD51-independent SSA recombination. *PLoS Genet.* 2013;9(11):e1003971. doi:  
554 10.1371/journal.pgen.1003971. PubMed PMID: 24278037.
- 555 18. Kuznetsov S, Pellegrini M, Shuda K, Fernandez-Capetillo O, Liu Y, Martin BK, et al.  
556 RAD51C deficiency in mice results in early prophase I arrest in males and sister chromatid  
557 separation at metaphase II in females. *J Cell Biol.* 2007;176(5):581-92. doi:  
558 10.1083/jcb.200608130. PubMed PMID: 17312021.
- 559 19. Liu Y, Tarsounas M, O'Regan P, West SC. Role of RAD51C and XRCC3 in genetic  
560 recombination and DNA repair. *J Biol Chem.* 2007;282(3):1973-9. doi:  
561 10.1074/jbc.M609066200. PubMed PMID: 17114795.
- 562 20. Zhang B, Wang M, Tang D, Li Y, Xu M, Gu M, et al. XRCC3 is essential for proper  
563 double-strand break repair and homologous recombination in rice meiosis. *J Exp Bot.*  
564 2015;66(19):5713-25. doi: 10.1093/jxb/erv253. PubMed PMID: 26034131.
- 565 21. Tang D, Miao C, Li Y, Wang H, Liu X, Yu H, et al. OsRAD51C is essential for double-  
566 strand break repair in rice meiosis. *Front Plant Sci.* 2014;5:167. doi: 10.3389/fpls.2014.00167.  
567 PubMed PMID: 24847337.
- 568 22. Su H, Cheng Z, Huang J, Lin J, Copenhaver GP, Ma H, et al. Arabidopsis RAD51,  
569 RAD51C and XRCC3 proteins form a complex and facilitate RAD51 localization on  
570 chromosomes for meiotic recombination. *PLoS Genet.* 2017;13(5):e1006827. doi:  
571 10.1371/journal.pgen.1006827. PubMed PMID: 28562599.
- 572 23. Abe K, Osakabe K, Nakayama S, Endo M, Tagiri A, Todoriki S, et al. Arabidopsis  
573 *RAD51C* gene is important for homologous recombination in meiosis and mitosis. *Plant*  
574 *Physiol.* 2005;139(2):896-908. doi: 10.1104/pp.105.065243. PubMed PMID: 16169964.
- 575 24. Bleuyard JY, Gallego ME, Savigny F, White CI. Differing requirements for the  
576 Arabidopsis Rad51 paralogs in meiosis and DNA repair. *Plant J.* 2005;41(4):533-45. doi:  
577 10.1111/j.1365-313X.2004.02318.x. PubMed PMID: 15686518.
- 578 25. Bleuyard JY, Gallego ME, White CI. The atspo11-1 mutation rescues atxrcc3 meiotic  
579 chromosome fragmentation. *Plant Mol Biol.* 2004;56(2):217-24. doi: 10.1007/s11103-004-  
580 2812-4. PubMed PMID: 15604739.
- 581 26. Bleuyard JY, White CI. The Arabidopsis homologue of Xrcc3 plays an essential role in  
582 meiosis. *EMBO J.* 2004;23(2):439-49. doi: 10.1038/sj.emboj.7600055. PubMed PMID:  
583 14726957.
- 584 27. Li W, Yang X, Lin Z, Timofejeva L, Xiao R, Makaroff CA, et al. The *AtRAD51C* gene is  
585 required for normal meiotic chromosome synapsis and double-stranded break repair in

- 586 Arabidopsis. *Plant Physiol.* 2005;138(2):965-76. doi: 10.1104/pp.104.058347. PubMed PMID:  
587 15923332.
- 588 28. Cartwright R, Dunn AM, Simpson PJ, Tambini CE, Thacker J. Isolation of novel human  
589 and mouse genes of the recA/RAD51 recombination-repair gene family. *Nucleic Acids Res.*  
590 1998;26(7):1653-9. doi: 10.1093/nar/26.7.1653. PubMed PMID: 9512535.
- 591 29. Cartwright R, Tambini CE, Simpson PJ, Thacker J. The XRCC2 DNA repair gene from  
592 human and mouse encodes a novel member of the recA/RAD51 family. *Nucleic Acids Res.*  
593 1998;26(13):3084-9. doi: 10.1093/nar/26.13.3084. PubMed PMID: 9628903.
- 594 30. Tarsounas M, Munoz P, Claas A, Smiraldo PG, Pittman DL, Blasco MA, et al. Telomere  
595 maintenance requires the RAD51D recombination/repair protein. *Cell.* 2004;117(3):337-47.  
596 doi: 10.1016/s0092-8674(04)00337-x. PubMed PMID: 15109494.
- 597 31. Chen C, Farmer AD, Langley RJ, Mudge J, Crow JA, May GD, et al. Meiosis-specific  
598 gene discovery in plants: RNA-Seq applied to isolated Arabidopsis male meiocytes. *BMC Plant*  
599 *Biol.* 2010;10:280. doi: 10.1186/1471-2229-10-280. PubMed PMID: 21167045.
- 600 32. Walker J, Gao H, Zhang J, Aldridge B, Vickers M, Higgins JD, et al. Sexual-lineage-  
601 specific DNA methylation regulates meiosis in Arabidopsis. *Nat Genet.* 2018;50(1):130-7. doi:  
602 10.1038/s41588-017-0008-5. PubMed PMID: 29255257.
- 603 33. Yang H, Lu P, Wang Y, Ma H. The transcriptome landscape of Arabidopsis male  
604 meiocytes from high-throughput sequencing: the complexity and evolution of the meiotic  
605 process. *Plant J.* 2011;65(4):503-16. doi: 10.1111/j.1365-313X.2010.04439.x. PubMed PMID:  
606 21208307.
- 607 34. Yang Y, Guo J, Dai L, Zhu Y, Hu H, Tan L, et al. XRCC2 mutation causes meiotic arrest,  
608 azoospermia and infertility. *J Med Genet.* 2018;55(9):628-36. doi: 10.1136/jmedgenet-2017-  
609 105145. PubMed PMID: 30042186.
- 610 35. Byun MY, Kim WT. Suppression of OsRAD51D results in defects in reproductive  
611 development in rice (*Oryza sativa L.*). *Plant J.* 2014;79(2):256-69. doi: 10.1111/tpj.12558.  
612 PubMed PMID: 24840804.
- 613 36. Charlot F, Chelysheva L, Kamisugi Y, Vrielynck N, Guyon A, Epert A, et al. RAD51B  
614 plays an essential role during somatic and meiotic recombination in *Physcomitrella*. *Nucleic*  
615 *Acids Res.* 2014;42(19):11965-78. doi: 10.1093/nar/gku890. PubMed PMID: 25260587.
- 616 37. Zhang F, Shen Y, Miao C, Cao Y, Shi W, Du G, et al. OsRAD51D promotes  
617 homologous pairing and recombination by preventing non-homologous interactions in rice  
618 meiosis. *New Phytol.* 2020. doi: 10.1111/nph.16595. PubMed PMID: 32275774.
- 619 38. Osakabe K, Abe K, Yamanouchi H, Takyuu T, Yoshioka T, Ito Y, et al. Arabidopsis  
620 Rad51B is important for double-strand DNA breaks repair in somatic cells. *Plant Mol Biol.*  
621 2005;57(6):819-33. doi: 10.1007/s11103-005-2187-1. PubMed PMID: 15952068.
- 622 39. Da Ines O, Degroote F, Amiard S, Goubely C, Gallego ME, White CI. Effects of XRCC2  
623 and RAD51B mutations on somatic and meiotic recombination in *Arabidopsis thaliana*. *Plant*  
624 *J.* 2013;74(6):959-70. doi: 10.1111/tpj.12182. PubMed PMID: 23521529.
- 625 40. Wang Y, Xiao R, Wang H, Cheng Z, Li W, Zhu G, et al. The Arabidopsis RAD51  
626 paralogs RAD51B, RAD51D and XRCC2 play partially redundant roles in somatic DNA repair  
627 and gene regulation. *New Phytol.* 2014;201(1):292-304. doi: 10.1111/nph.12498. PubMed  
628 PMID: 24102485.



- 629 41. Abreu CM, Prakash R, Romanienko PJ, Roig I, Keeney S, Jasin M. Shu complex  
630 SWS1-SWSAP1 promotes early steps in mouse meiotic recombination. *Nat Commun.*  
631 2018;9(1):3961. doi: 10.1038/s41467-018-06384-x. PubMed PMID: 30305635.
- 632 42. Ceballos SJ, Heyer WD. Functions of the Snf2/Swi2 family Rad54 motor protein in  
633 homologous recombination. *Biochim Biophys Acta.* 2011;1809(9):509-23. doi:  
634 10.1016/j.bbagr.2011.06.006. PubMed PMID: 21704205.
- 635 43. Crickard JB, Greene EC. Helicase Mechanisms During Homologous Recombination in  
636 *Saccharomyces cerevisiae*. *Annu Rev Biophys.* 2019. doi: 10.1146/annurev-biophys-052118-  
637 115418. PubMed PMID: 30857400.
- 638 44. Mazin AV, Mazina OM, Bugreev DV, Rossi MJ. Rad54, the motor of homologous  
639 recombination. *DNA Repair (Amst).* 2010;9(3):286-302. doi: 10.1016/j.dnarep.2009.12.006.  
640 PubMed PMID: 20089461.
- 641 45. Ghabrial A, Ray RP, Schupbach T. *okra* and *spindle-B* encode components of the  
642 RAD52 DNA repair pathway and affect meiosis and patterning in *Drosophila* oogenesis. *Genes*  
643 *Dev.* 1998;12(17):2711-23. doi: 10.1101/gad.12.17.2711. PubMed PMID: 9732269.
- 644 46. Kooistra R, Vreeken K, Zonneveld JB, de Jong A, Eeken JC, Osgood CJ, et al. The  
645 *Drosophila melanogaster* RAD54 homolog, DmRAD54, is involved in the repair of radiation  
646 damage and recombination. *Mol Cell Biol.* 1997;17(10):6097-104. doi:  
647 10.1128/mcb.17.10.6097. PubMed PMID: 9315669.
- 648 47. Mets DG, Meyer BJ. Condensins regulate meiotic DNA break distribution, thus  
649 crossover frequency, by controlling chromosome structure. *Cell.* 2009;139(1):73-86. doi:  
650 10.1016/j.cell.2009.07.035. PubMed PMID: 19781752.
- 651 48. Bishop DK, Park D, Xu L, Kleckner N. *DMC1*: a meiosis-specific yeast homolog of *E.*  
652 *coli recA* required for recombination, synaptonemal complex formation, and cell cycle  
653 progression. *Cell.* 1992;69(3):439-56. doi: 10.1016/0092-8674(92)90446-j. PubMed PMID:  
654 1581960.
- 655 49. Cloud V, Chan YL, Grubb J, Budke B, Bishop DK. Rad51 is an accessory factor for  
656 Dmc1-mediated joint molecule formation during meiosis. *Science.* 2012;337(6099):1222-5.  
657 doi: 10.1126/science.1219379. PubMed PMID: 22955832.
- 658 50. Da Ines O, Degroote F, Goubely C, Amiard S, Gallego ME, White CI. Meiotic  
659 recombination in *Arabidopsis* is catalysed by DMC1, with RAD51 playing a supporting role.  
660 *PLoS Genet.* 2013;9(9):e1003787. doi: 10.1371/journal.pgen.1003787. PubMed PMID:  
661 24086145.
- 662 51. Niu H, Wan L, Busygina V, Kwon Y, Allen JA, Li X, et al. Regulation of meiotic  
663 recombination via Mek1-mediated Rad54 phosphorylation. *Mol Cell.* 2009;36(3):393-404. doi:  
664 10.1016/j.molcel.2009.09.029. PubMed PMID: 19917248.
- 665 52. Tsubouchi H, Roeder GS. Budding yeast Hed1 down-regulates the mitotic  
666 recombination machinery when meiotic recombination is impaired. *Genes Dev.*  
667 2006;20(13):1766-75. doi: 10.1101/gad.1422506. PubMed PMID: 16818607.
- 668 53. Callender TL, Laureau R, Wan L, Chen X, Sandhu R, Laljee S, et al. Mek1 Down  
669 Regulates Rad51 Activity during Yeast Meiosis by Phosphorylation of Hed1. *PLoS Genet.*  
670 2016;12(8):e1006226. doi: 10.1371/journal.pgen.1006226. PubMed PMID: 27483004.

- 671 54. Lao JP, Cloud V, Huang CC, Grubb J, Thacker D, Lee CY, et al. Meiotic crossover  
672 control by concerted action of Rad51-Dmc1 in homolog template bias and robust homeostatic  
673 regulation. PLoS Genet. 2013;9(12):e1003978. doi: 10.1371/journal.pgen.1003978. PubMed  
674 PMID: 24367271.
- 675 55. Busygina V, Saro D, Williams G, Leung WK, Say AF, Sehorn MG, et al. Novel attributes  
676 of Hed1 affect dynamics and activity of the Rad51 presynaptic filament during meiotic  
677 recombination. J Biol Chem. 2012;287(2):1566-75. doi: 10.1074/jbc.M111.297309. PubMed  
678 PMID: 22115747.
- 679 56. Busygina V, Sehorn MG, Shi IY, Tsubouchi H, Roeder GS, Sung P. Hed1 regulates  
680 Rad51-mediated recombination via a novel mechanism. Genes Dev. 2008;22(6):786-95. doi:  
681 10.1101/gad.1638708. PubMed PMID: 18347097.
- 682 57. Hong S, Sung Y, Yu M, Lee M, Kleckner N, Kim KP. The logic and mechanism of  
683 homologous recombination partner choice. Mol Cell. 2013;51(4):440-53. doi:  
684 10.1016/j.molcel.2013.08.008. PubMed PMID: 23973374.
- 685 58. Crickard JB, Kaniecki K, Kwon Y, Sung P, Lisby M, Greene EC. Regulation of Hed1  
686 and Rad54 binding during maturation of the meiosis-specific presynaptic complex. EMBO J.  
687 2018;37(7). doi: 10.15252/embj.201798728. PubMed PMID: 29444896.
- 688 59. Liu Y, Gaines WA, Callender T, Busygina V, Oke A, Sung P, et al. Down-regulation of  
689 Rad51 activity during meiosis in yeast prevents competition with Dmc1 for repair of double-  
690 strand breaks. PLoS Genet. 2014;10(1):e1004005. doi: 10.1371/journal.pgen.1004005.  
691 PubMed PMID: 24465215.
- 692 60. Arbel A, Zenvirth D, Simchen G. Sister chromatid-based DNA repair is mediated by  
693 RAD54, not by DMC1 or TID1. EMBO J. 1999;18(9):2648-58. doi: 10.1093/emboj/18.9.2648.  
694 PubMed PMID: 10228176.
- 695 61. Bishop DK, Nikolski Y, Oshiro J, Chon J, Shinohara M, Chen X. High copy number  
696 suppression of the meiotic arrest caused by a dmc1 mutation: REC114 imposes an early  
697 recombination block and RAD54 promotes a DMC1-independent DSB repair pathway. Genes  
698 Cells. 1999;4(8):425-44. doi: 10.1046/j.1365-2443.1999.00273.x. PubMed PMID: 10526232.
- 699 62. Catlett MG, Forsburg SL. *Schizosaccharomyces pombe* Rdh54 (TID1) acts with Rhp54  
700 (RAD54) to repair meiotic double-strand breaks. Mol Biol Cell. 2003;14(11):4707-20. doi:  
701 10.1091/mbc.e03-05-0288. PubMed PMID: 14551247.
- 702 63. Schmuckli-Maurer J, Heyer WD. Meiotic recombination in RAD54 mutants of  
703 *Saccharomyces cerevisiae*. Chromosoma. 2000;109(1-2):86-93. doi:  
704 10.1007/s004120050415. PubMed PMID: 10855498.
- 705 64. Shinohara M, Gasior SL, Bishop DK, Shinohara A. Tid1/Rdh54 promotes colocalization  
706 of rad51 and dmc1 during meiotic recombination. Proc Natl Acad Sci U S A.  
707 2000;97(20):10814-9. doi: 10.1073/pnas.97.20.10814. PubMed PMID: 11005857.
- 708 65. Shinohara M, Sakai K, Shinohara A, Bishop DK. Crossover interference in  
709 *Saccharomyces cerevisiae* requires a TID1/RDH54- and DMC1-dependent pathway.  
710 Genetics. 2003;163(4):1273-86. PubMed PMID: 12702674.
- 711 66. Shinohara M, Shita-Yamaguchi E, Buerstedde JM, Shinagawa H, Ogawa H, Shinohara  
712 A. Characterization of the roles of the *Saccharomyces cerevisiae* RAD54 gene and a



- 713 homologue of RAD54, RDH54/TID1, in mitosis and meiosis. *Genetics*. 1997;147(4):1545-56.  
714 PubMed PMID: 9409820.
- 715 67. Subramanian VV, MacQueen AJ, Vader G, Shinohara M, Sanchez A, Borde V, et al.  
716 Chromosome Synapsis Alleviates Mek1-Dependent Suppression of Meiotic DNA Repair. *PLoS*  
717 *Biol*. 2016;14(2):e1002369. doi: 10.1371/journal.pbio.1002369. PubMed PMID: 26870961.
- 718 68. Nimonkar AV, Dombrowski CC, Siino JS, Stasiak AZ, Stasiak A, Kowalczykowski SC.  
719 *Saccharomyces cerevisiae* Dmc1 and Rad51 proteins preferentially function with Tid1 and  
720 Rad54 proteins, respectively, to promote DNA strand invasion during genetic recombination.  
721 *J Biol Chem*. 2012;287(34):28727-37. doi: 10.1074/jbc.M112.373290. PubMed PMID:  
722 22761450.
- 723 69. Essers J, Hendriks RW, Swagemakers SM, Troelstra C, de Wit J, Bootsma D, et al.  
724 Disruption of mouse RAD54 reduces ionizing radiation resistance and homologous  
725 recombination. *Cell*. 1997;89(2):195-204. doi: 10.1016/s0092-8674(00)80199-3. PubMed  
726 PMID: 9108475.
- 727 70. Wesoly J, Agarwal S, Sigurdsson S, Bussen W, Van Komen S, Qin J, et al. Differential  
728 contributions of mammalian Rad54 paralogs to recombination, DNA damage repair, and  
729 meiosis. *Mol Cell Biol*. 2006;26(3):976-89. doi: 10.1128/MCB.26.3.976-989.2006. PubMed  
730 PMID: 16428451.
- 731 71. Klutstein M, Shaked H, Sherman A, Avivi-Ragolsky N, Shema E, Zenvirth D, et al.  
732 Functional conservation of the yeast and Arabidopsis *RAD54-like* genes. *Genetics*.  
733 2008;178(4):2389-97. doi: 10.1534/genetics.108.086777. PubMed PMID: 18430956.
- 734 72. Hirakawa T, Hasegawa J, White CI, Matsunaga S. RAD54 forms DNA repair foci in  
735 response to DNA damage in living plant cells. *Plant J*. 2017;90(2):372-82. doi:  
736 10.1111/tpj.13499. PubMed PMID: 28155243.
- 737 73. Hirakawa T, Katagiri Y, Ando T, Matsunaga S. DNA double-strand breaks alter the  
738 spatial arrangement of homologous loci in plant cells. *Sci Rep*. 2015;5:11058. doi:  
739 10.1038/srep11058. PubMed PMID: 26046331.
- 740 74. Osakabe K, Abe K, Yoshioka T, Osakabe Y, Todoriki S, Ichikawa H, et al. Isolation and  
741 characterization of the *RAD54* gene from *Arabidopsis thaliana*. *Plant J*. 2006;48(6):827-42.  
742 doi: 10.1111/j.1365-313X.2006.02927.x. PubMed PMID: 17227544.
- 743 75. Roth N, Klimesch J, Dukowic-Schulze S, Pacher M, Mannuss A, Puchta H. The  
744 requirement for recombination factors differs considerably between different pathways of  
745 homologous double-strand break repair in somatic plant cells. *Plant J*. 2012;72(5):781-90. doi:  
746 10.1111/j.1365-313X.2012.05119.x. PubMed PMID: 22860689.
- 747 76. Shaked H, Avivi-Ragolsky N, Levy AA. Involvement of the Arabidopsis SWI2/SNF2  
748 chromatin remodeling gene family in DNA damage response and recombination. *Genetics*.  
749 2006;173(2):985-94. doi: 10.1534/genetics.105.051664. PubMed PMID: 16547115.
- 750 77. Mannuss A, Dukowic-Schulze S, Suer S, Hartung F, Pacher M, Puchta H. RAD5A,  
751 RECQ4A, and MUS81 have specific functions in homologous recombination and define  
752 different pathways of DNA repair in *Arabidopsis thaliana*. *Plant Cell*. 2010;22(10):3318-30. doi:  
753 10.1105/tpc.110.078568. PubMed PMID: 20971895.
- 754 78. Crismani W, Mercier R. Identifying meiotic mutants in *Arabidopsis thaliana*. *Methods*  
755 *Mol Biol*. 2013;990:227-34. doi: 10.1007/978-1-62703-333-6\_22. PubMed PMID: 23559218.

- 756 79. Berchowitz LE, Copenhaver GP. Fluorescent Arabidopsis tetrads: a visual assay for  
757 quickly developing large crossover and crossover interference data sets. *Nat Protoc.*  
758 2008;3(1):41-50. doi: 10.1038/nprot.2007.491. PubMed PMID: 18193020.
- 759 80. Francis KE, Lam SY, Harrison BD, Bey AL, Berchowitz LE, Copenhaver GP. Pollen  
760 tetrad-based visual assay for meiotic recombination in Arabidopsis. *Proc Natl Acad Sci U S A.*  
761 2007;104(10):3913-8. doi: 10.1073/pnas.0608936104. PubMed PMID: 17360452.
- 762 81. Francis KE, Lam SY, Copenhaver GP. Separation of Arabidopsis pollen tetrads is  
763 regulated by QUARTET1, a pectin methylesterase gene. *Plant Physiol.* 2006;142(3):1004-13.  
764 doi: 10.1104/pp.106.085274. PubMed PMID: 16980565.
- 765 82. Couteau F, Belzile F, Horlow C, Grandjean O, Vezon D, Doutriaux MP. Random  
766 chromosome segregation without meiotic arrest in both male and female meiocytes of a *dmc1*  
767 mutant of Arabidopsis. *Plant Cell.* 1999;11(9):1623-34. PubMed PMID: 10488231.
- 768 83. Pradillo M, Lopez E, Linacero R, Romero C, Cunado N, Sanchez-Moran E, et al.  
769 Together yes, but not coupled: new insights into the roles of RAD51 and DMC1 in plant meiotic  
770 recombination. *Plant J.* 2012;69(6):921-33. doi: 10.1111/j.1365-313X.2011.04845.x. PubMed  
771 PMID: 22066484.
- 772 84. Zhang Z, Fan HY, Goldman JA, Kingston RE. Homology-driven chromatin remodeling  
773 by human RAD54. *Nat Struct Mol Biol.* 2007;14(5):397-405. doi: 10.1038/nsmb1223. PubMed  
774 PMID: 17417655.
- 775 85. Argunhan B, Leung WK, Afshar N, Terentyev Y, Subramanian VV, Murayama Y, et al.  
776 Fundamental cell cycle kinases collaborate to ensure timely destruction of the synaptonemal  
777 complex during meiosis. *EMBO J.* 2017;36(17):2488-509. doi: 10.15252/embj.201695895.  
778 PubMed PMID: 28694245.
- 779 86. Prugar E, Burnett C, Chen X, Hollingsworth NM. Coordination of Double Strand Break  
780 Repair and Meiotic Progression in Yeast by a Mek1-Ndt80 Negative Feedback Loop. *Genetics.*  
781 2017;206(1):497-512. doi: 10.1534/genetics.117.199703. PubMed PMID: 28249986.
- 782 87. Uanschou C, Ronceret A, Von Harder M, De Muyt A, Vezon D, Pereira L, et al.  
783 Sufficient amounts of functional HOP2/MND1 complex promote interhomolog DNA repair but  
784 are dispensable for intersister DNA repair during meiosis in Arabidopsis. *Plant Cell.*  
785 2013;25(12):4924-40. doi: 10.1105/tpc.113.118521. PubMed PMID: 24363313.
- 786 88. Daley JM, Gaines WA, Kwon Y, Sung P. Regulation of DNA pairing in homologous  
787 recombination. *Cold Spring Harb Perspect Biol.* 2014;6(11):a017954. doi:  
788 10.1101/cshperspect.a017954. PubMed PMID: 25190078.
- 789 89. Knizewski L, Ginalski K, Jerzmanowski A. Snf2 proteins in plants: gene silencing and  
790 beyond. *Trends Plant Sci.* 2008;13(10):557-65. doi: 10.1016/j.tplants.2008.08.004. PubMed  
791 PMID: 18786849.
- 792 90. Singh G, Da Ines O, Gallego ME, White CI. Analysis of the impact of the absence of  
793 RAD51 strand exchange activity in Arabidopsis meiosis. *PLoS One.* 2017;12(8):e0183006.  
794 doi: 10.1371/journal.pone.0183006. PubMed PMID: 28797117.
- 795 91. Vignard J, Siwec T, Chelysheva L, Vrielynck N, Gonord F, Armstrong SJ, et al. The  
796 interplay of RecA-related proteins and the MND1-HOP2 complex during meiosis in *Arabidopsis*  
797 *thaliana*. *PLoS Genet.* 2007;3(10):1894-906. doi: 10.1371/journal.pgen.0030176. PubMed  
798 PMID: 17937504.

- 799 92. Sandhu R, Monge Neria F, Monge Neria J, Chen X, Hollingsworth NM, Borner GV.  
800 DNA Helicase Mph1(FANCM) Ensures Meiotic Recombination between Parental  
801 Chromosomes by Dissociating Precocious Displacement Loops. *Dev Cell*. 2020;53(4):458-72  
802 e5. doi: 10.1016/j.devcel.2020.04.010. PubMed PMID: 32386601.
- 803 93. Alonso JM, Stepanova AN, Leisse TJ, Kim CJ, Chen H, Shinn P, et al. Genome-wide  
804 insertional mutagenesis of *Arabidopsis thaliana*. *Science*. 2003;301(5633):653-7. doi:  
805 10.1126/science.1086391. PubMed PMID: 12893945.
- 806 94. Li W, Chen C, Markmann-Mulisch U, Timofejeva L, Schmelzer E, Ma H, et al. The  
807 *Arabidopsis AtRAD51* gene is dispensable for vegetative development but required for  
808 meiosis. *Proc Natl Acad Sci U S A*. 2004;101(29):10596-601. doi: 10.1073/pnas.0404110101.  
809 PubMed PMID: 15249667.
- 810 95. Ross KJ, Fransz P, Jones GH. A light microscopic atlas of meiosis in *Arabidopsis*  
811 *thaliana*. *Chromosome Res*. 1996;4(7):507-16. PubMed PMID: 8939362.
- 812 96. Armstrong SJ, Caryl AP, Jones GH, Franklin FC. Asy1, a protein required for meiotic  
813 chromosome synapsis, localizes to axis-associated chromatin in *Arabidopsis* and *Brassica*. *J*  
814 *Cell Sci*. 2002;115(Pt 18):3645-55. doi: 10.1242/jcs.00048. PubMed PMID: 12186950.
- 815 97. Higgins JD, Armstrong SJ, Franklin FC, Jones GH. The *Arabidopsis MutS* homolog  
816 *AtMSH4* functions at an early step in recombination: evidence for two classes of recombination  
817 in *Arabidopsis*. *Genes Dev*. 2004;18(20):2557-70. doi: 10.1101/gad.317504. PubMed PMID:  
818 15489296.
- 819 98. Kurzbauer MT, Uanschou C, Chen D, Schlogelhofer P. The recombinases DMC1 and  
820 RAD51 are functionally and spatially separated during meiosis in *Arabidopsis*. *Plant Cell*.  
821 2012;24(5):2058-70. doi: 10.1105/tpc.112.098459. PubMed PMID: 22589466.  
822
- 823

## 824 **Figure Legends**

### 825 **Figure 1. Characterisation of *rad54-2* T-DNA insertion mutant and sensitivity to MMC.**

826 (A) Structure of *AtRAD54* (At3g19210) and the *rad54-1* and *rad54-2* T-DNA insertion mutant  
827 alleles. Boxes show exons (unfilled) and 5' and 3'UTRs (grey fill). The positions of the T-DNA  
828 insertions in the two alleles (inverted triangles) is indicated, with arrows above showing  
829 orientation of the left borders, and the sequences of the *rad54-2* T-DNA/chromosome junctions  
830 below. The *rad54-2* T-DNA insertion is flanked by two left borders (LB1, LB2) and accompanied  
831 by a 11 bp deletion in exon 4. An in-frame TGA STOP codon in *rad54-2* is underlined.  
832 Numbering under the sequences is relative to the *RAD54* start codon. (B) RT-PCR analyses  
833 of transcripts of *rad54-1* and *rad54-2*. Amplification of the actin transcript (ACT) was used as  
834 a control for RT-PCR. Positions and orientations of the PCR primers are shown on the  
835 diagrams.

836 (C-D) Sensitivity of *rad54-1* and *rad54-2* plants to MMC. (C) Two-week-old seedlings grown  
837 without, or with 40  $\mu$ M MMC are shown. (D) Sensitivity of the seedlings was scored after 2  
838 weeks (see Materials and Methods) and the percentages of resistant plants (plants with more  
839 than 3 true leaves) are shown. Symbols are mean  $\pm$  s.e.m of at least 3 independent  
840 experiments.

841

### 842 **Figure 2. Both *rad54-1* and *rad54-2* mutants have WT meiosis.**

843 Chromosome spreads of male meiocytes in wild type (A-D), *rad54-1* (E-H) and *rad54-2* (I-L).  
844 Pachytene (A,E,I); Metaphase I (B,F,J); Metaphase II (C,G,K); Telophase II (D,H,L).  
845 Chromosomes were spread and stained with DAPI. (Scale bar = 10  $\mu$ m).

846

### 847 **Figure 3. Crossing-over is not affected in *rad54-2* mutant meiosis.**

848 Genetic distances (in centiMorgans, cM) measured from fluorescent tetrad analyses in marked  
849 intervals on (A) chromosome 1 (I1b and I1c) and (B) chromosome 2 (I2f and I2g). Bars indicate  
850 mean  $\pm$  SD. On all intervals, WT and *rad54* do not significantly differ ( $p < 0.05$ ; Z-test).

851

852 **Figure 4. Absence of RAD54 leads to chromosome fragmentation in *dmc1* meiosis.**

853 Male meiosis is shown in (A-D) wild-type, (E-H) *dmc1*, (I-L) *dmc1 rad54-1*, (M-P) *dmc1 rad54-*  
854 *2*, and *rad51* (Q-T). Chromosome spreads at late prophase I (A,E,I,M,Q), Metaphase I  
855 (B,F,J,N,R), Anaphase I (C,G,K,O,S) and Telophase II/Tetrad (D,H,L,P,T). Chromosomes  
856 were spread and stained with DAPI. (Scale bar = 10  $\mu$ m).

857

858 **Figure 5. Absence of RAD54 does not affect numbers of meiotic RAD51 foci.**

859 (A) Co-immunolocalization of RAD51 (green) and the chromosome axis protein ASY1 (red) on  
860 leptotene/zygotene meiotic chromosome spreads. (Scale Bars: 5  $\mu$ m). (B) Quantification of  
861 RAD51 foci per positive cell through early prophase I in wild-type, *rad54*, *dmc1*, and *dmc1*  
862 *rad54-2* mutants. Means  $\pm$  s.e.m are indicated. n.s.: not significantly different (p-value > 0.05,  
863 Kruskal-Wallis test).

864

865 **Figure 6. Absence of RAD51B, RAD51D or XRCC2 does not affect *dmc1* meiosis.**

866 Male meiosis is shown in (A-C) *dmc1*, (D-F) *dmc1 rad51b*, (G-I) *dmc1 rad51d*, (J-L) *dmc1*  
867 *xrcc2*, and *dmc1 xrcc3* (M-O). Chromosome spreads at (A,D,G,J,M) late prophase I,  
868 (B,E,H,K,N) Metaphase I, (C,F,I,L,O) Anaphase I. Chromosomes were spread and stained  
869 with DAPI. (Scale bar = 10  $\mu$ m).

870

871 **Supporting information**

872

873 **Supplemental Figure 1. Fertility of *rad54-1* and *rad54-2* mutants.**

874 **(A)** pictures of wild-type and *rad54* mutant siliques. **(B)** Number of seeds per silique in Wild-  
875 type, *rad54-1* and *rad54-2* mutants. Each point represents the number of seeds in one silique.  
876 Bars indicate mean  $\pm$  SEM. n.s. : not significantly different.  $P > 0.05$  (unpaired, two-tailed  
877 Mann-Whitney test).

878

879 **Supplemental Figure 2. Genetic recombination in wild-type, *rad54-1* and *rad54-2***  
880 **mutants measured using I2fg fluorescent-tagged lines.**

881 Genetic distances (in centiMorgans, cM) calculated from tetrad analysis of the I2f and I2g  
882 intervals on chromosome 2. Bars indicate mean  $\pm$  SD. For both intervals, WT and *rad54* plants  
883 do not significantly differ ( $p < 0.05$ ; Z-test).

884

885 **Supplemental Figure 3. Fertility of *dmc1 rad54-1* and *dmc1 rad54-2* mutant plants.**

886 Number of seeds per silique in Wild-type, *dmc1*, *dmc1 rad54-1* and *dmc1 rad54-2* mutants.  
887 Each spot represents the number of seeds in one silique. Bars indicate mean  $\pm$  SEM. \*\*\*\*:  
888 significantly different.  $P < 0.0001$  (unpaired, two-tailed Mann-Whitney test).

889

890 **Table S1. FTLs raw data.**

891 Tetrad count for all tetrad categories for I1bc and I2fg intervals. Tetrad categories (a to l) were  
892 classified as described previously by Berchowitz and Copenhaver (2008).

893



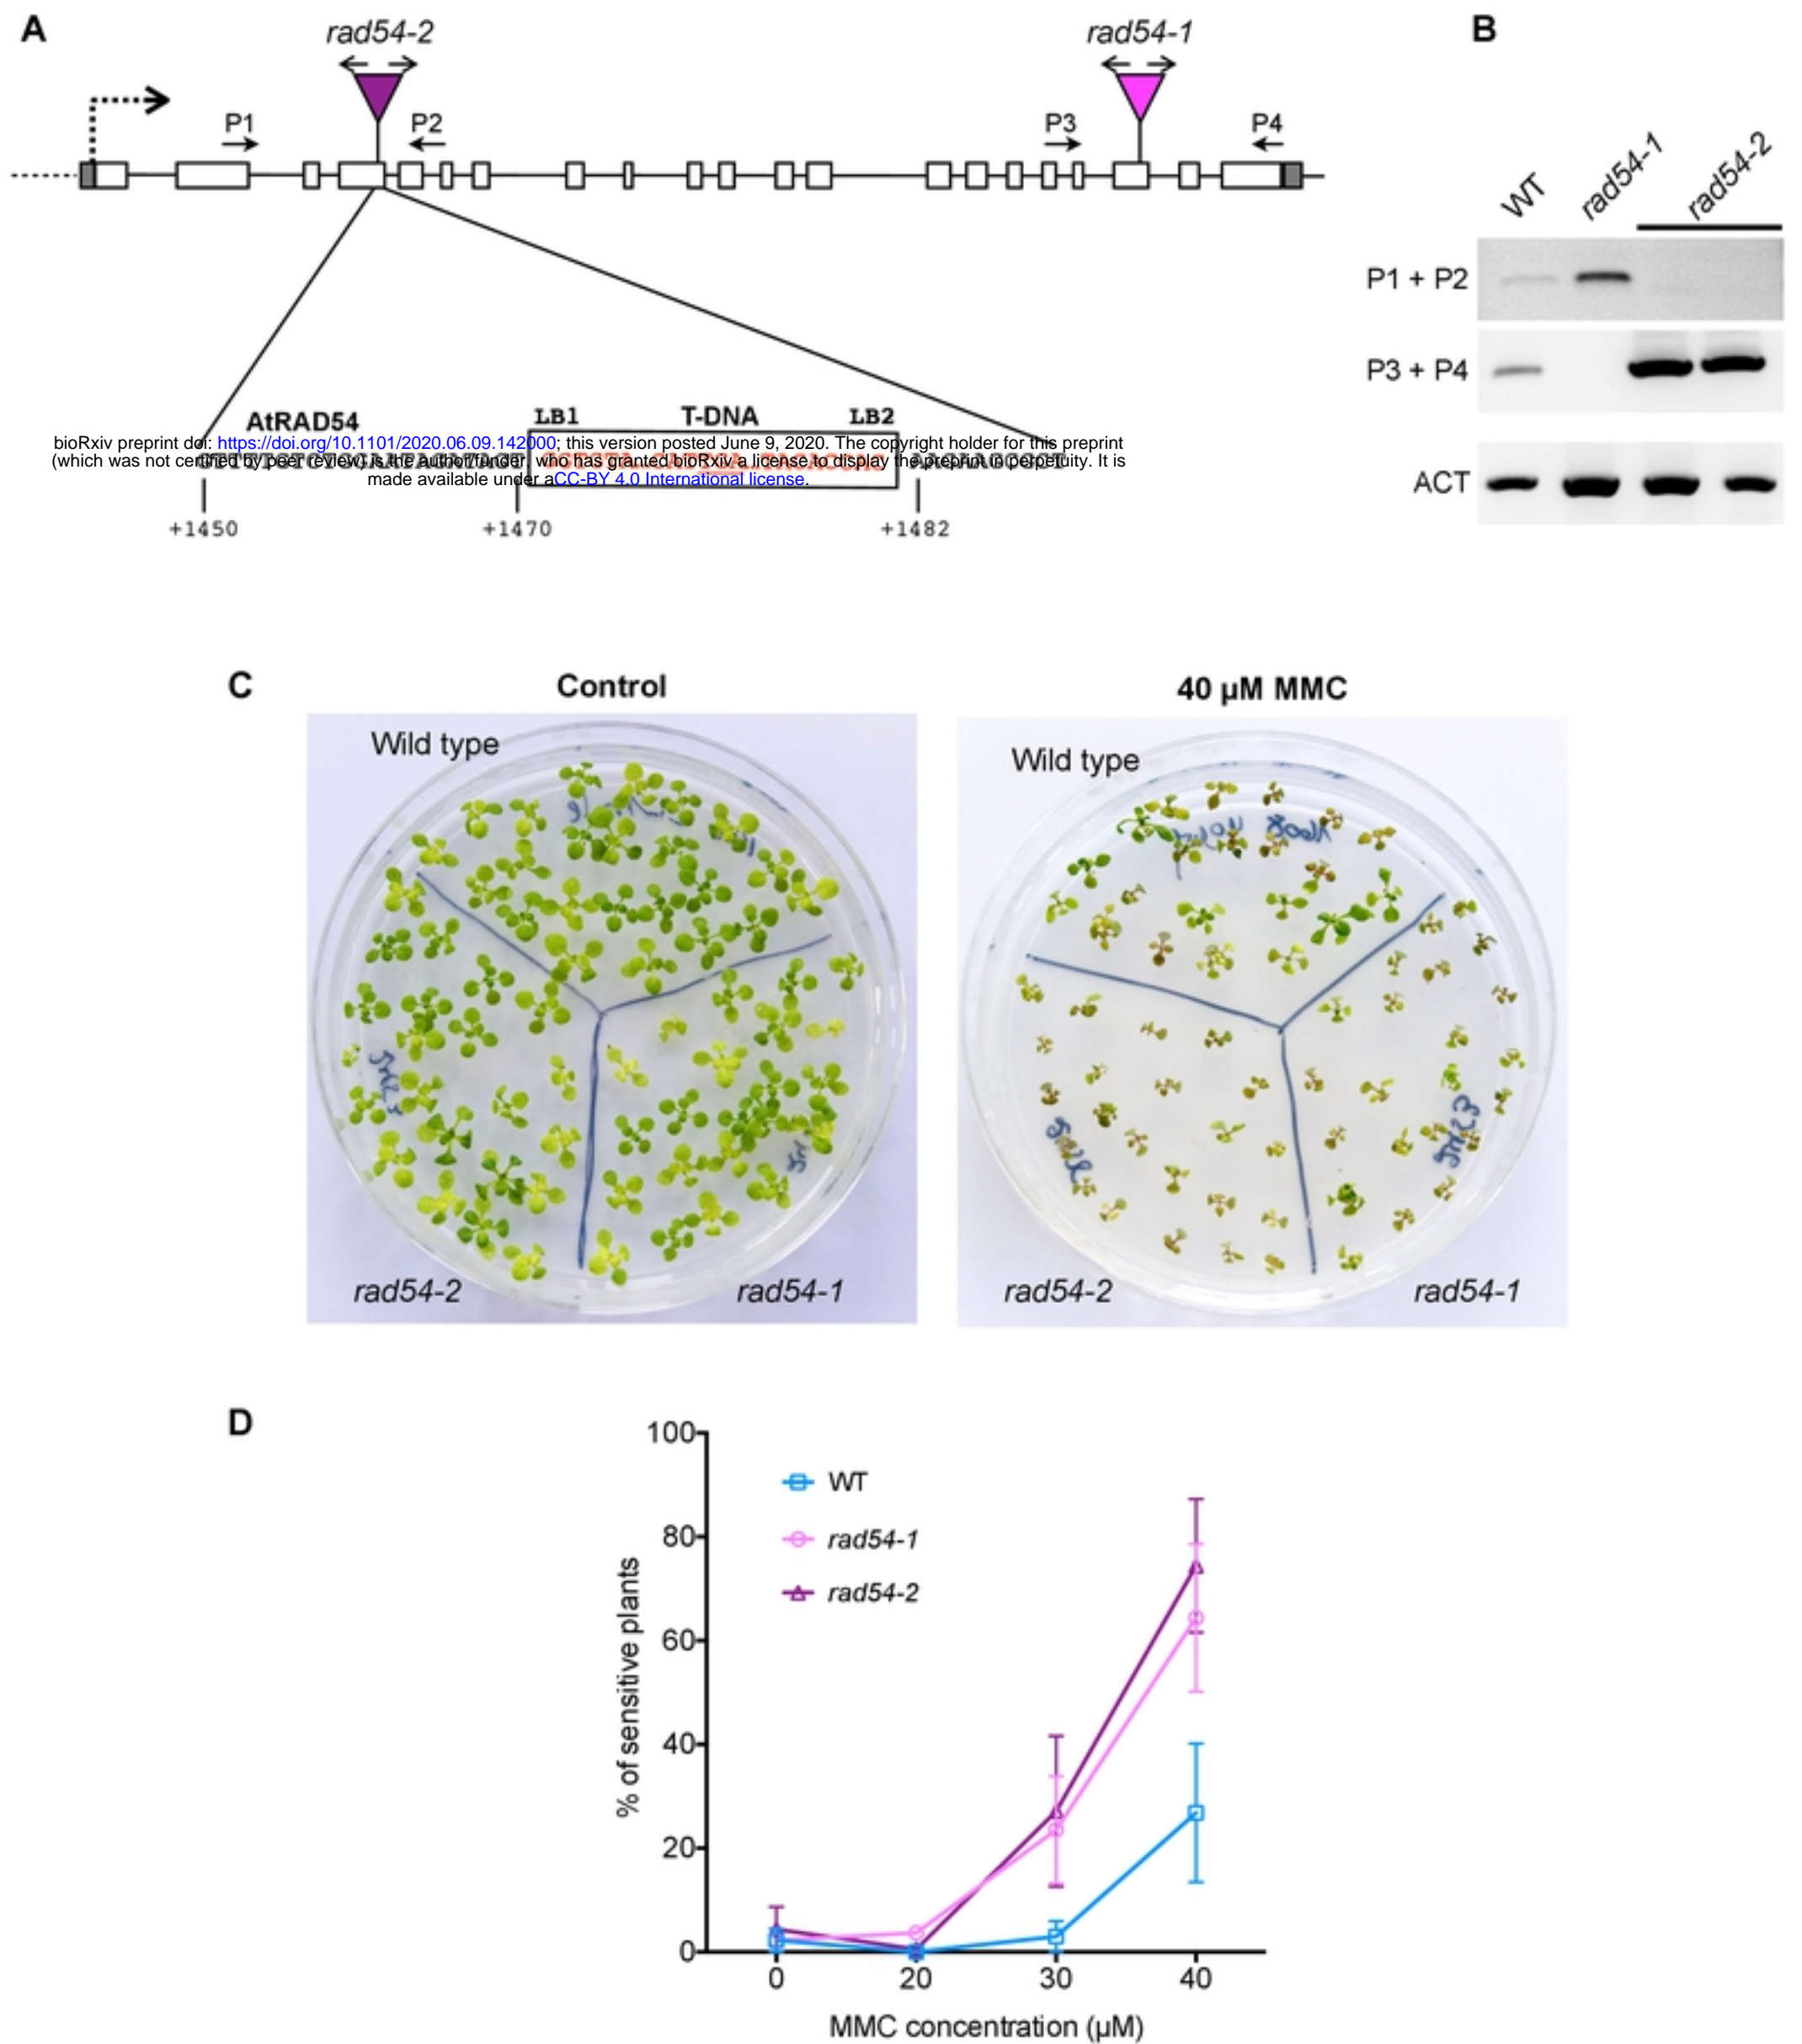

Figure 1

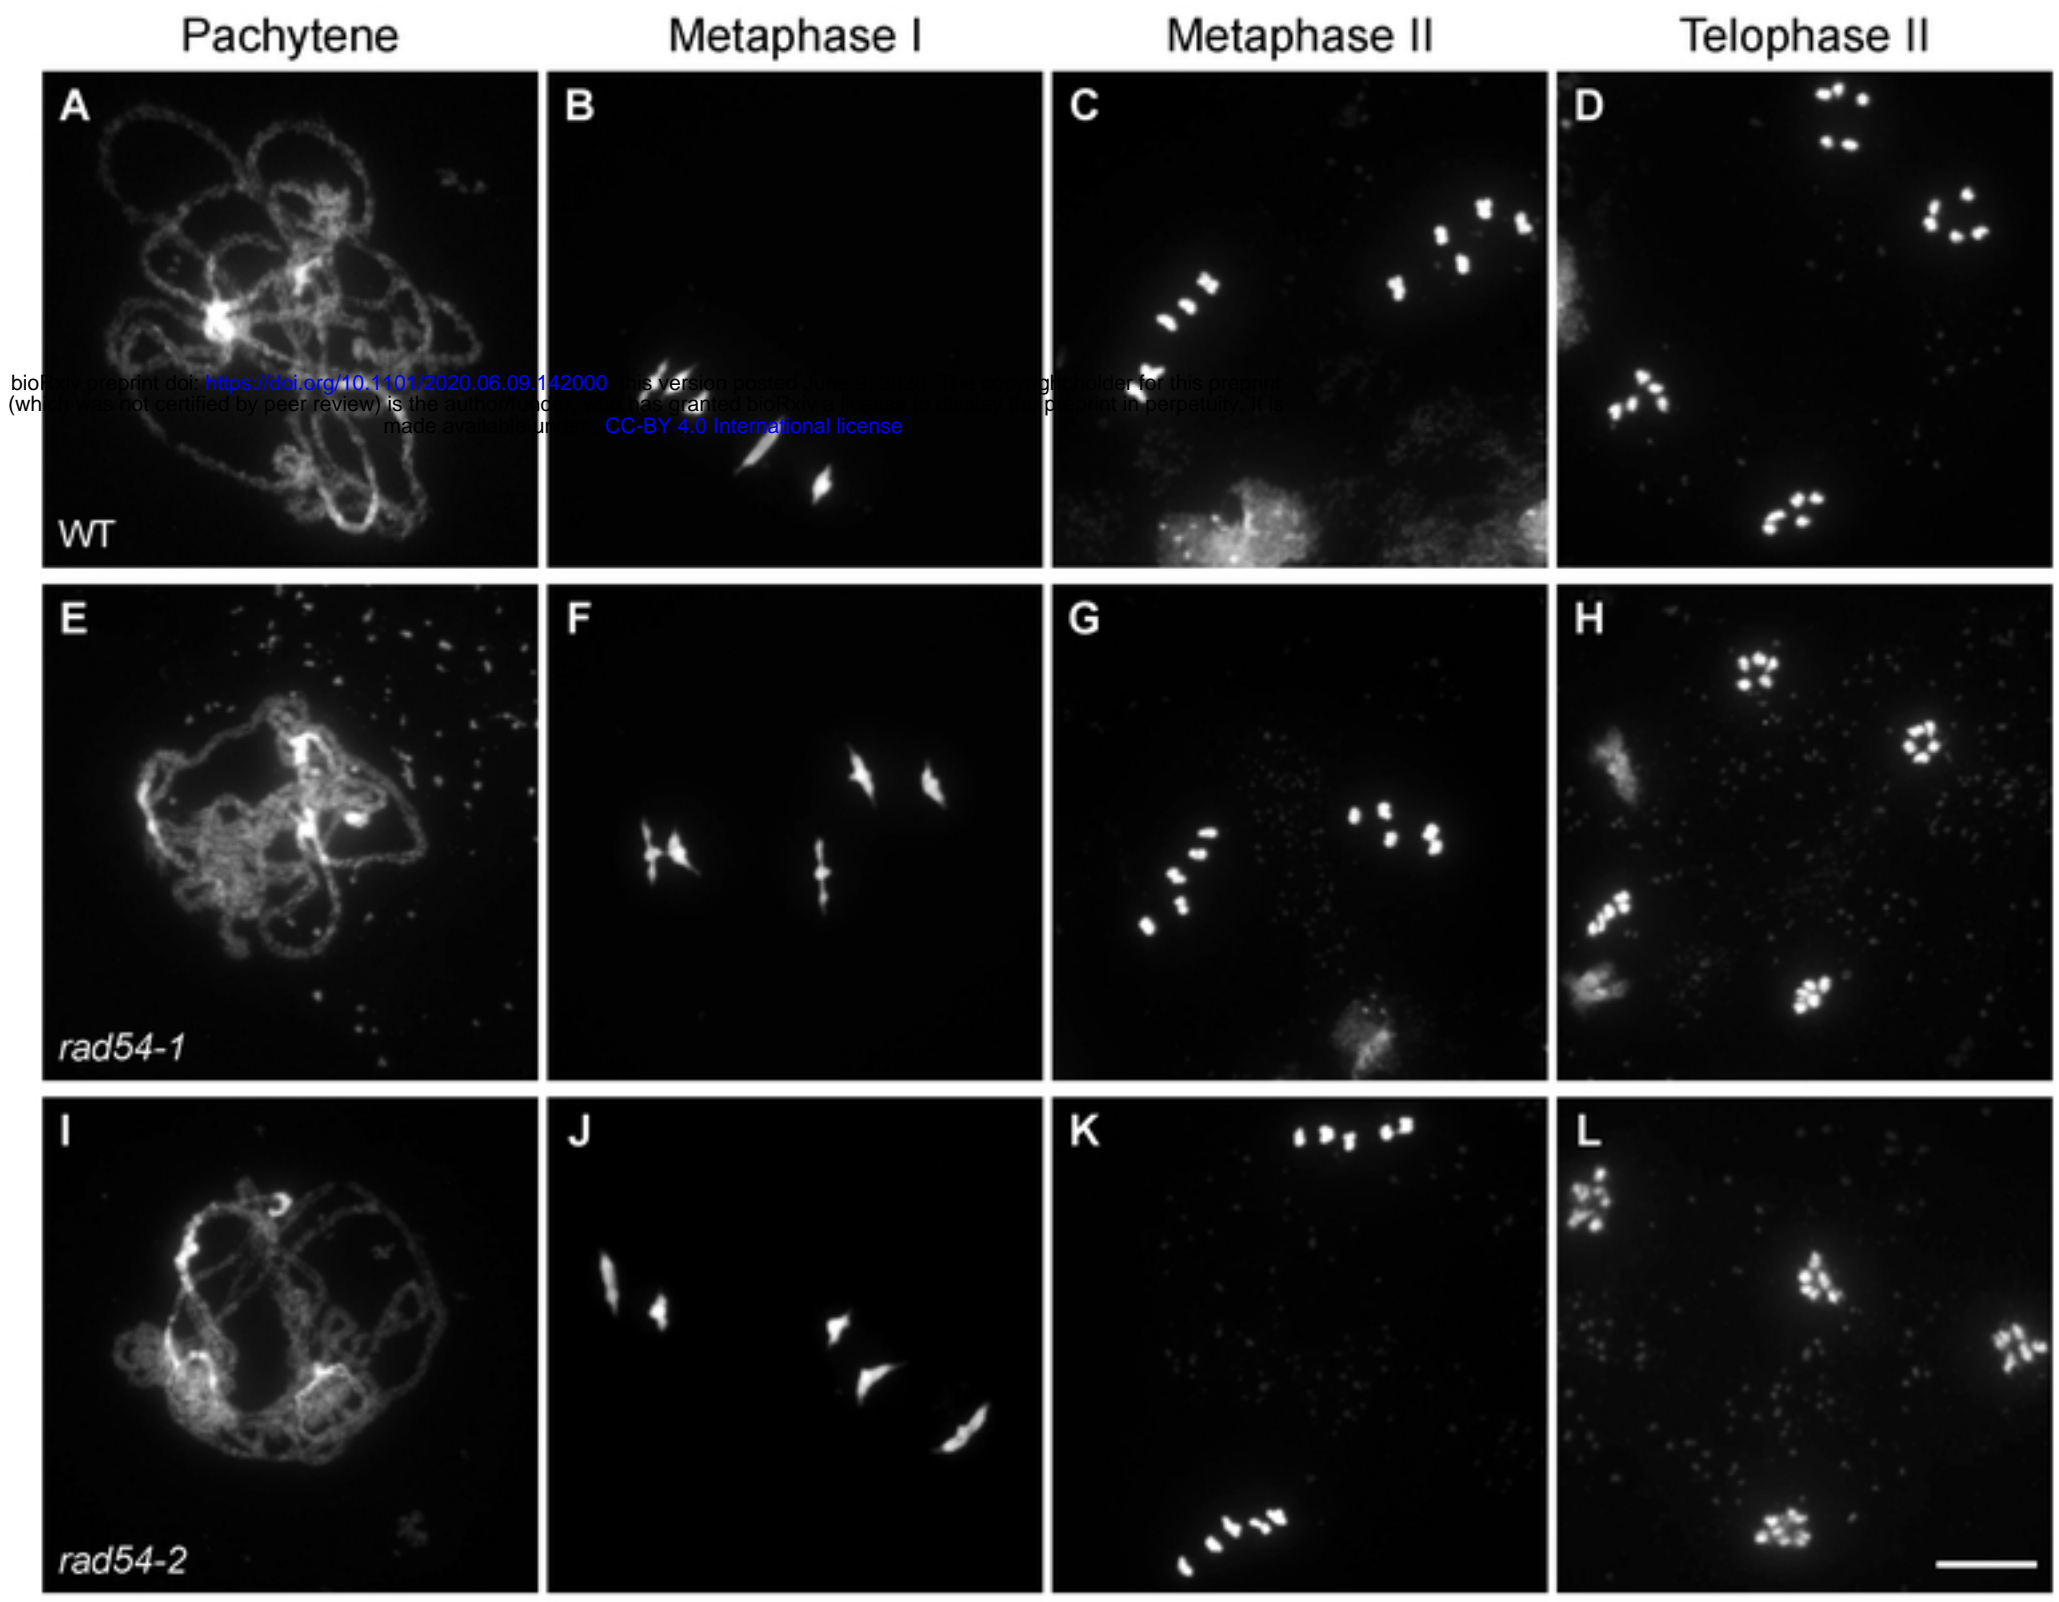

Figure 2



bioRxiv preprint doi: <https://doi.org/10.1101/2020.06.09.142000>; this version posted June 9, 2020. The copyright holder for this preprint (which was not certified by peer review) is the author/funder, who has granted bioRxiv a license to display the preprint in perpetuity. It is made available under aCC-BY 4.0 International license.

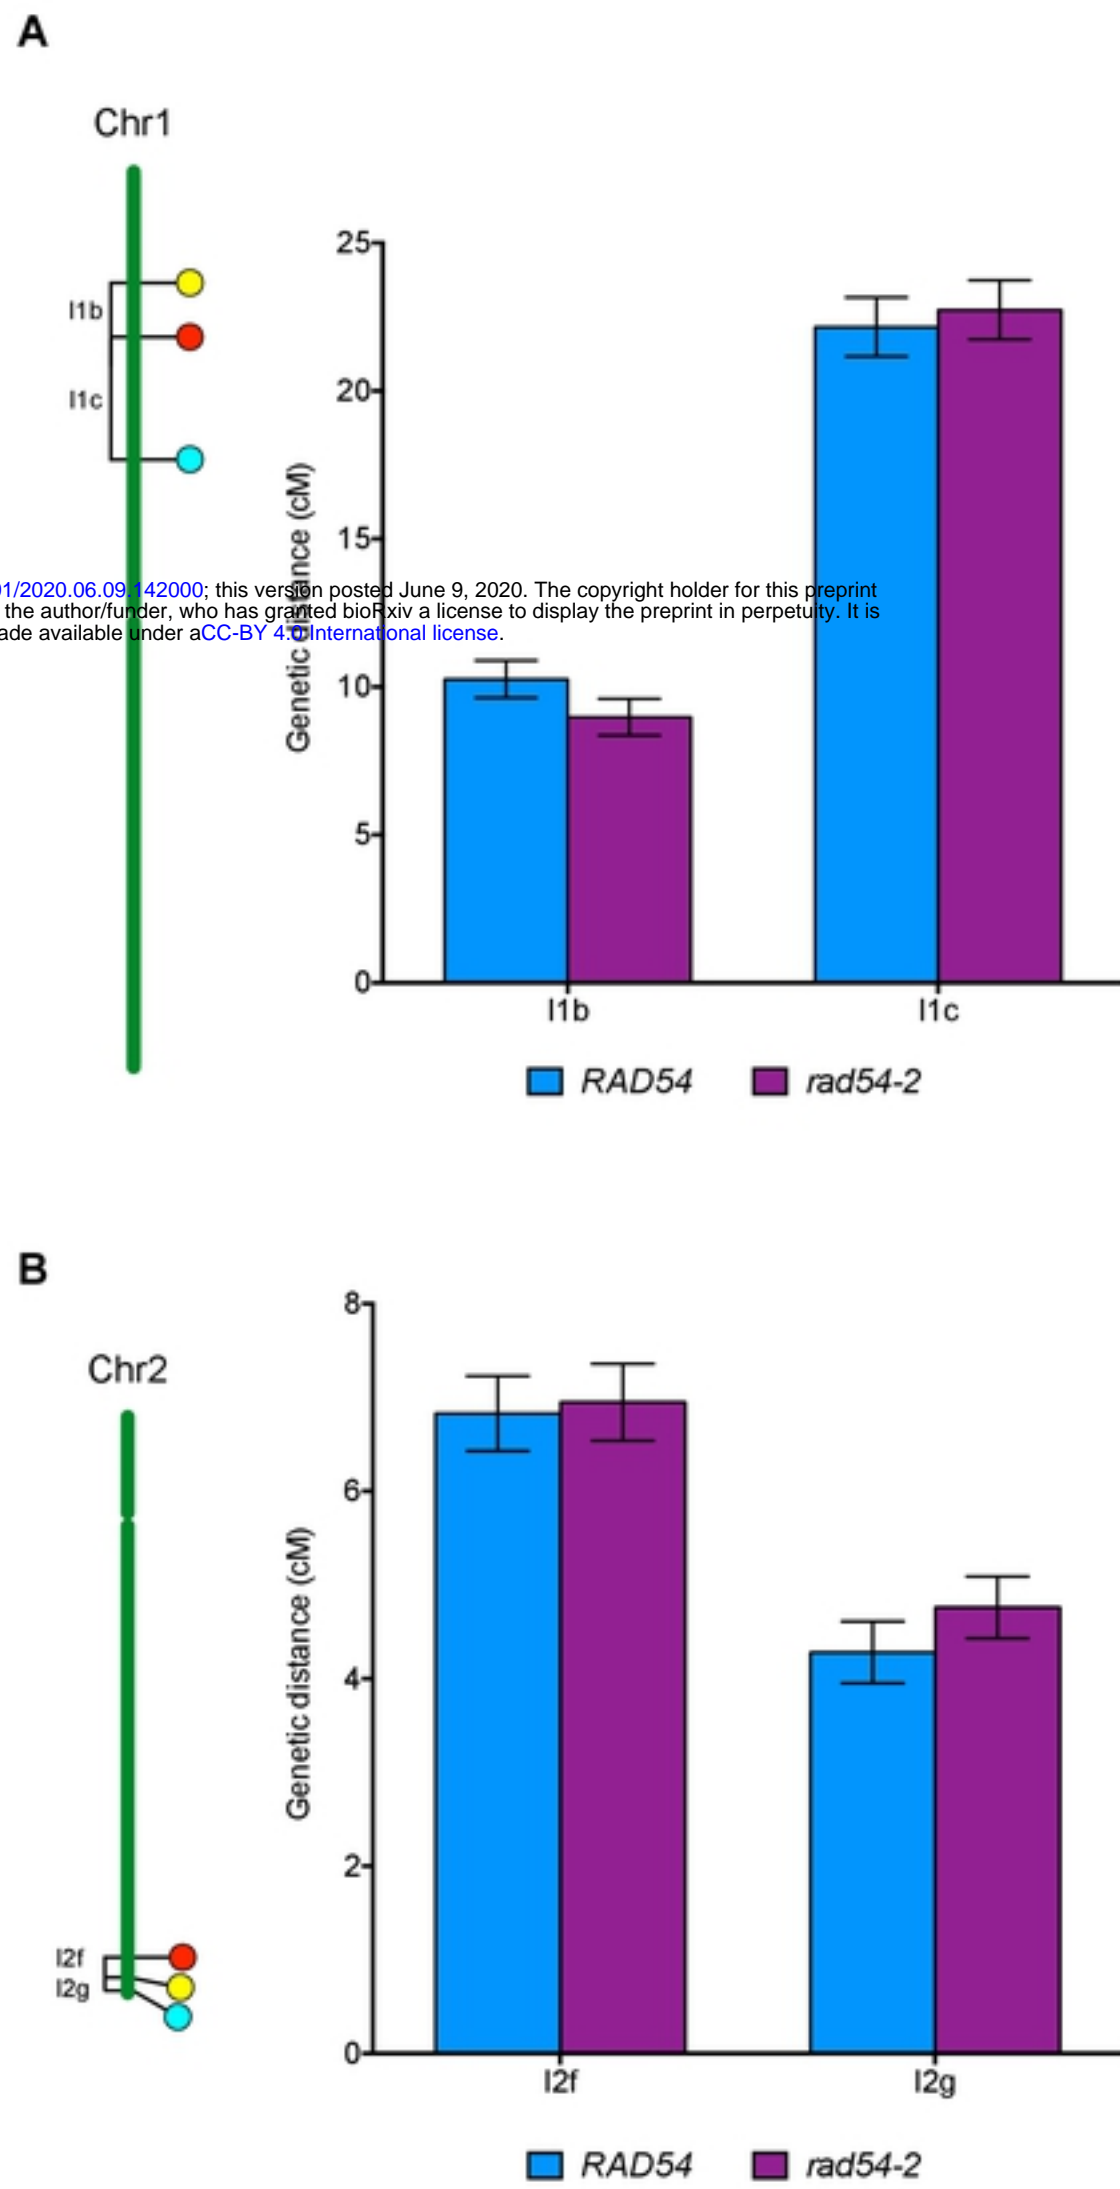

Figure 3

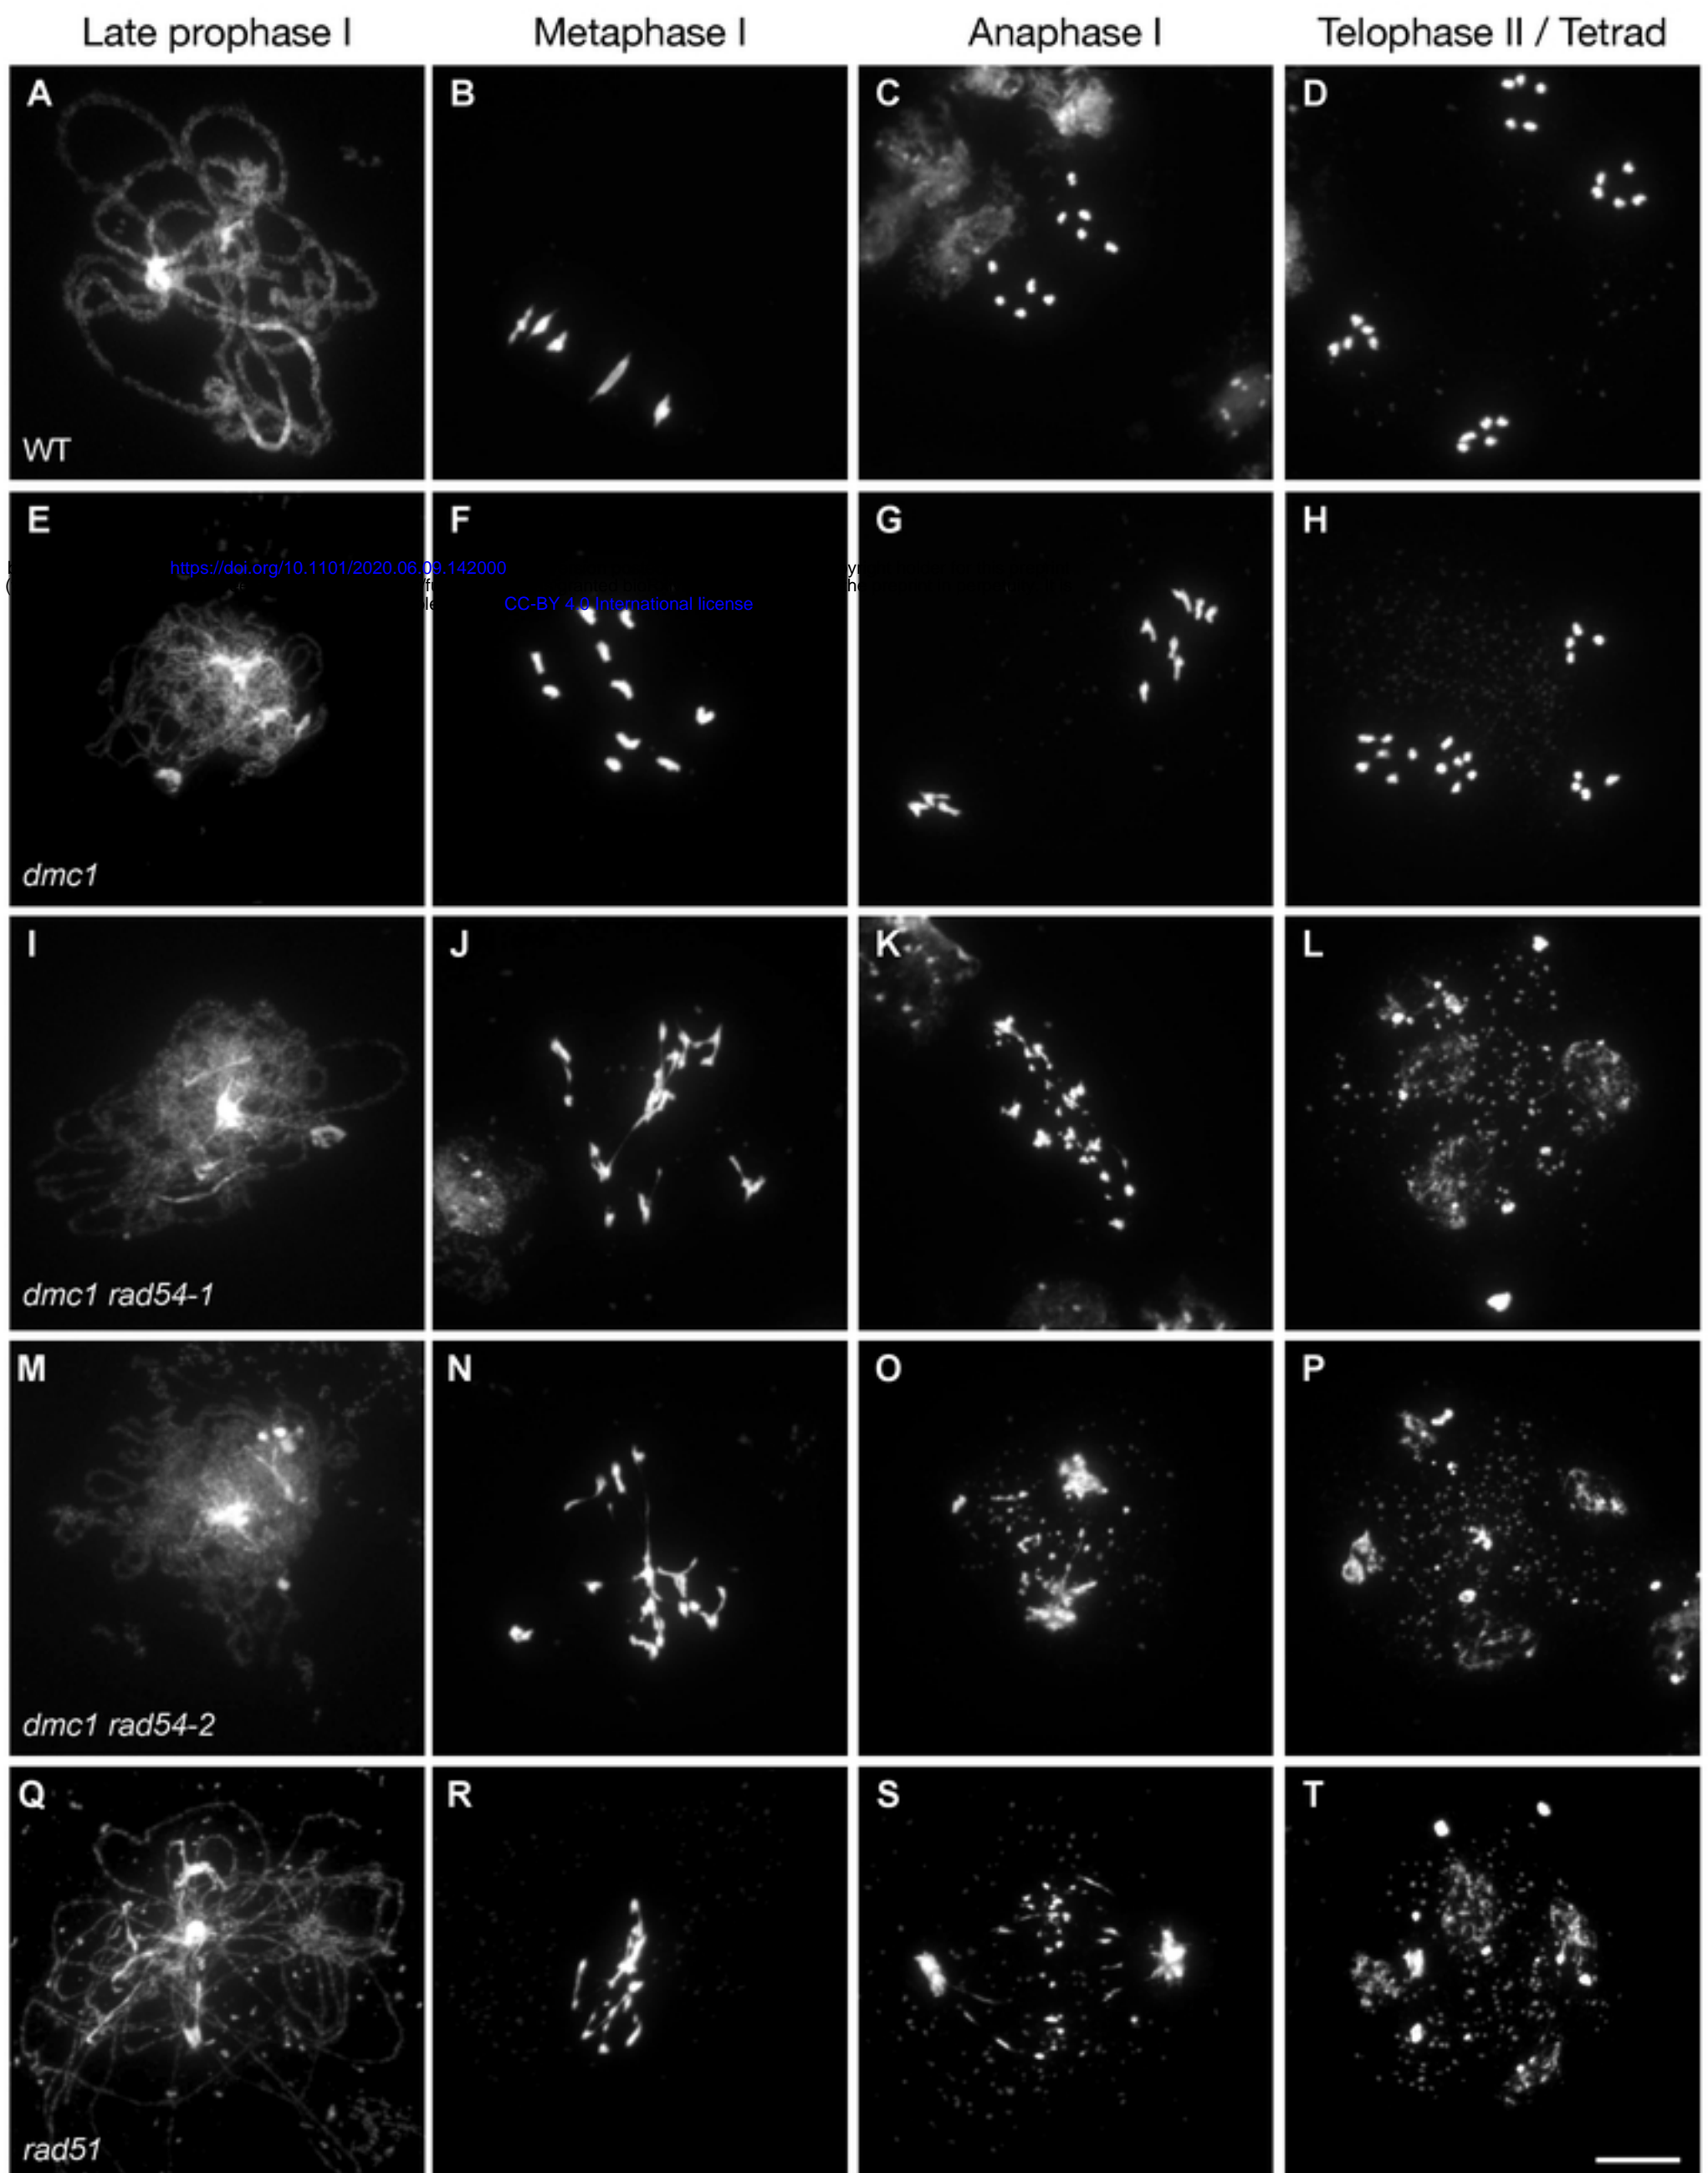

Figure 4

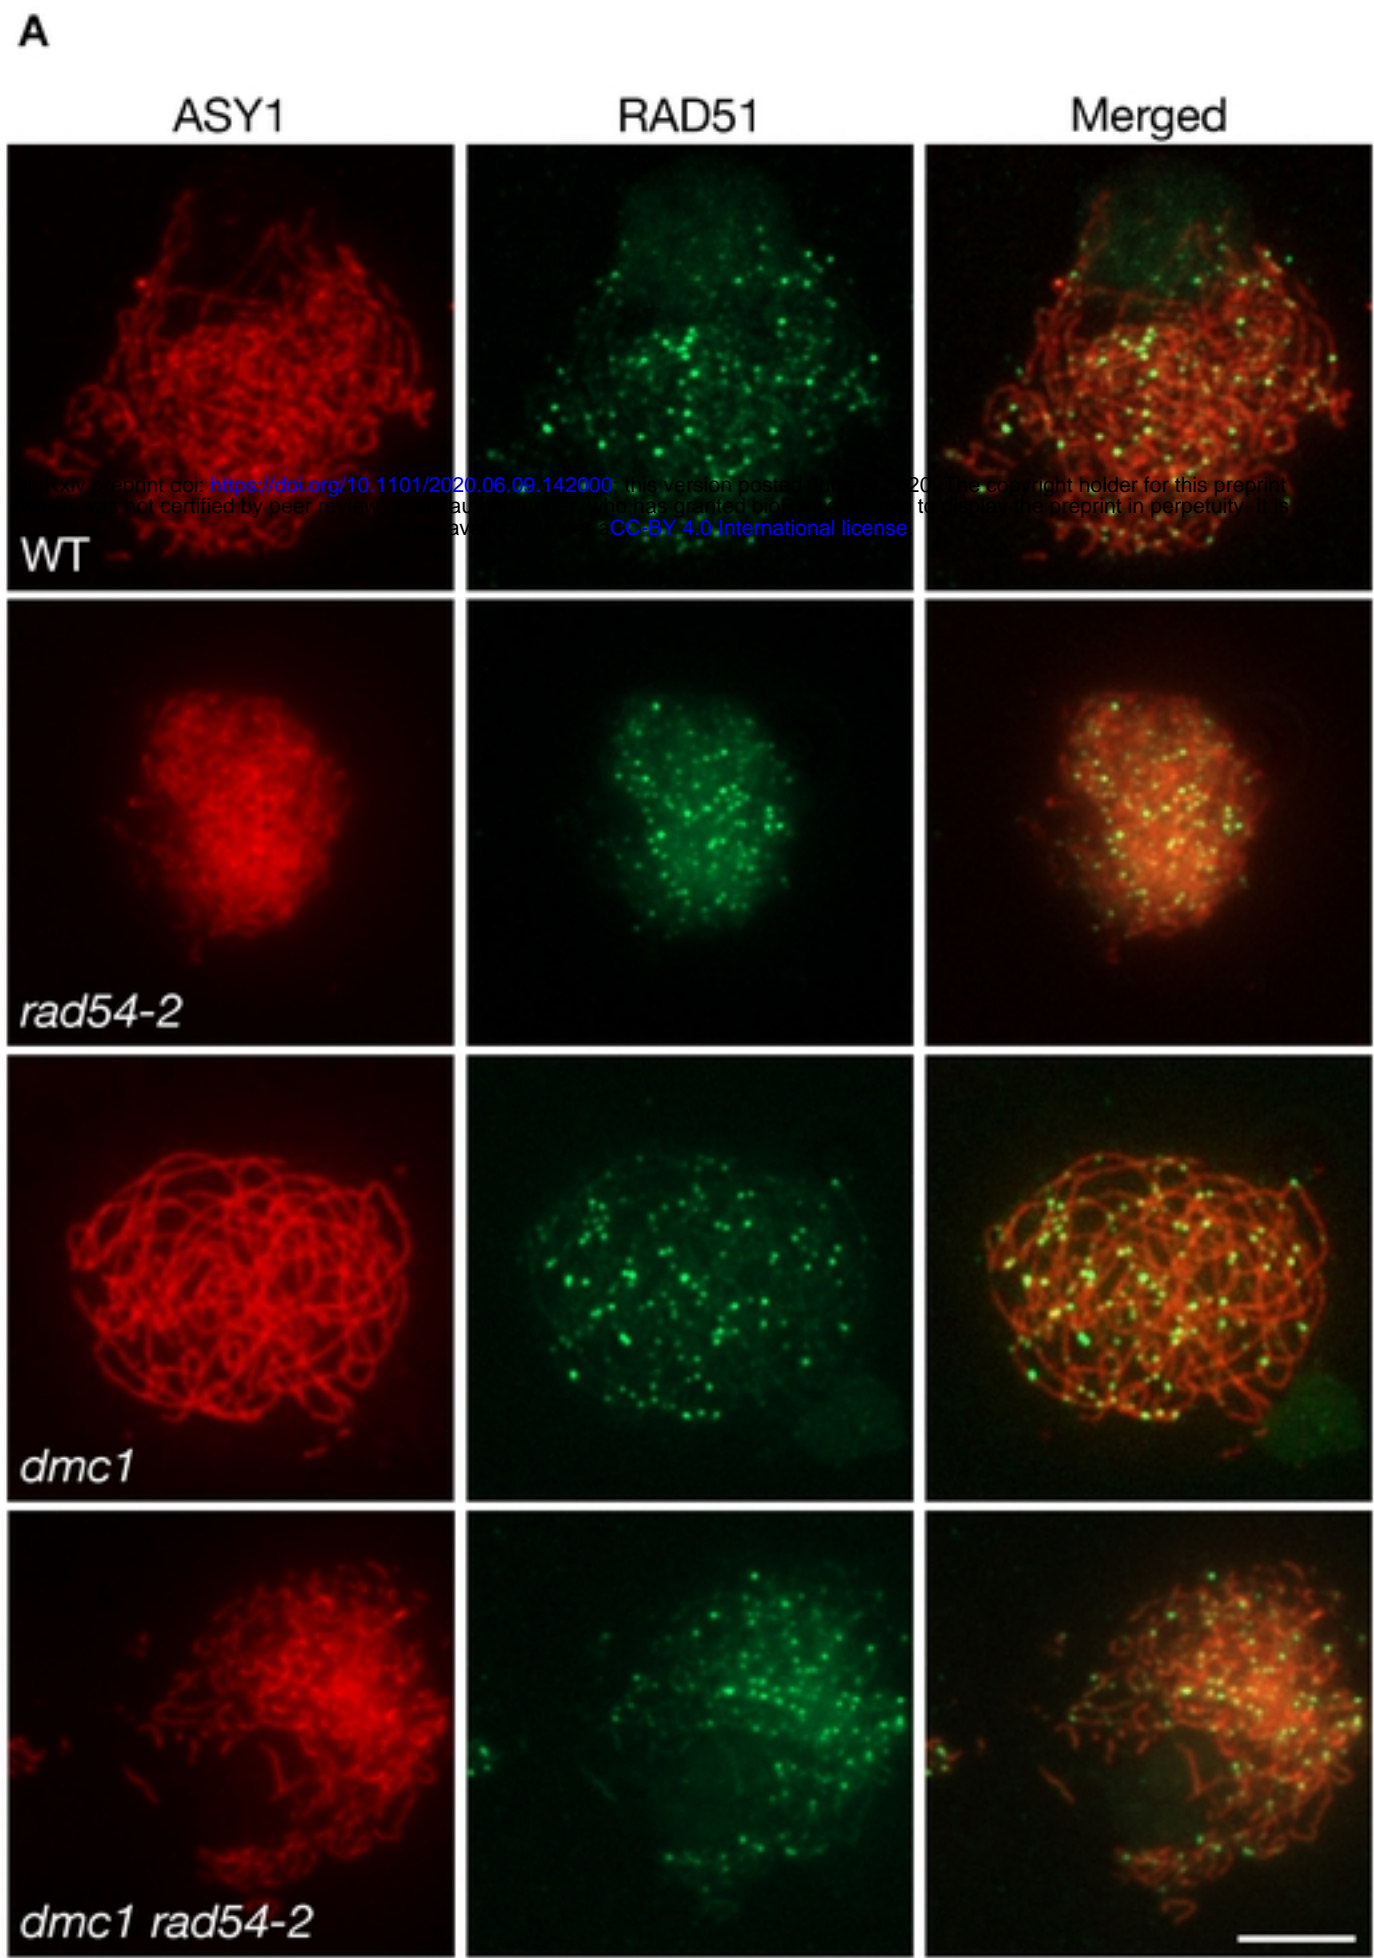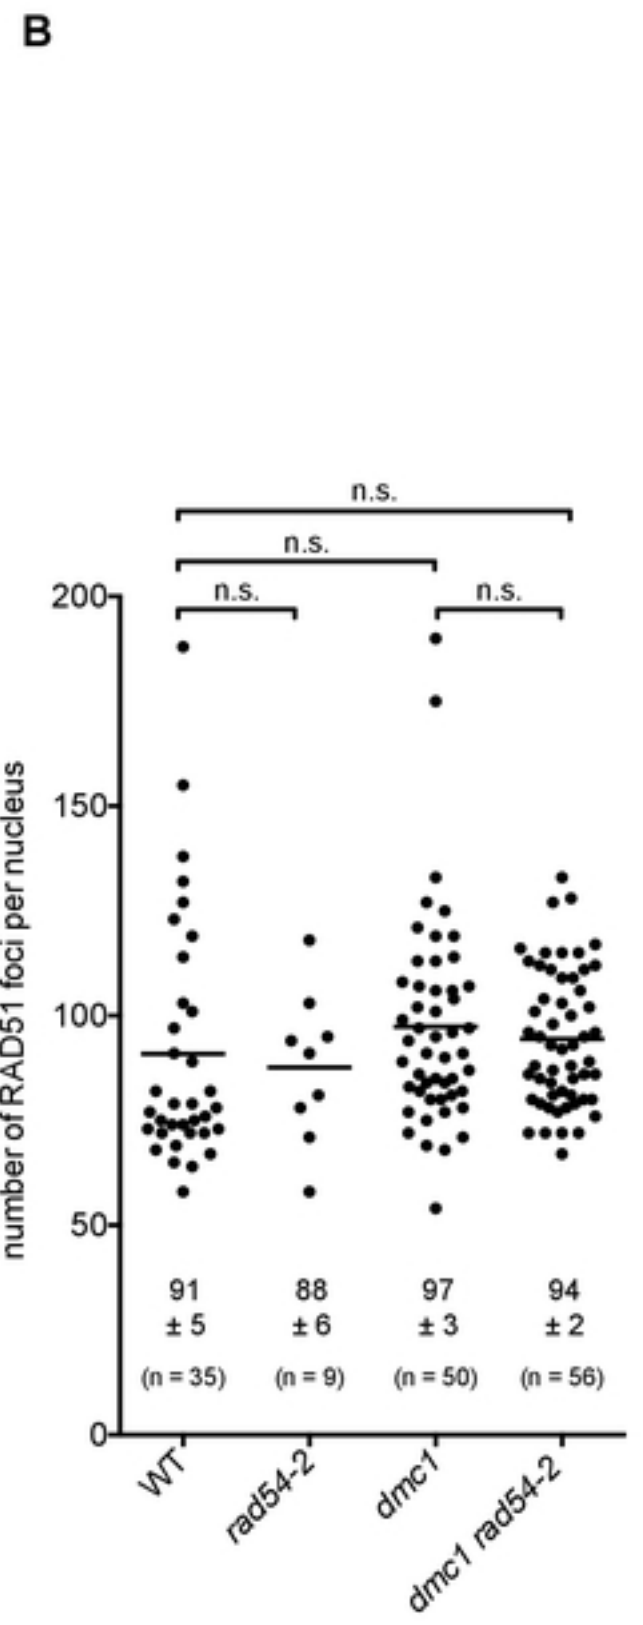

Figure 5



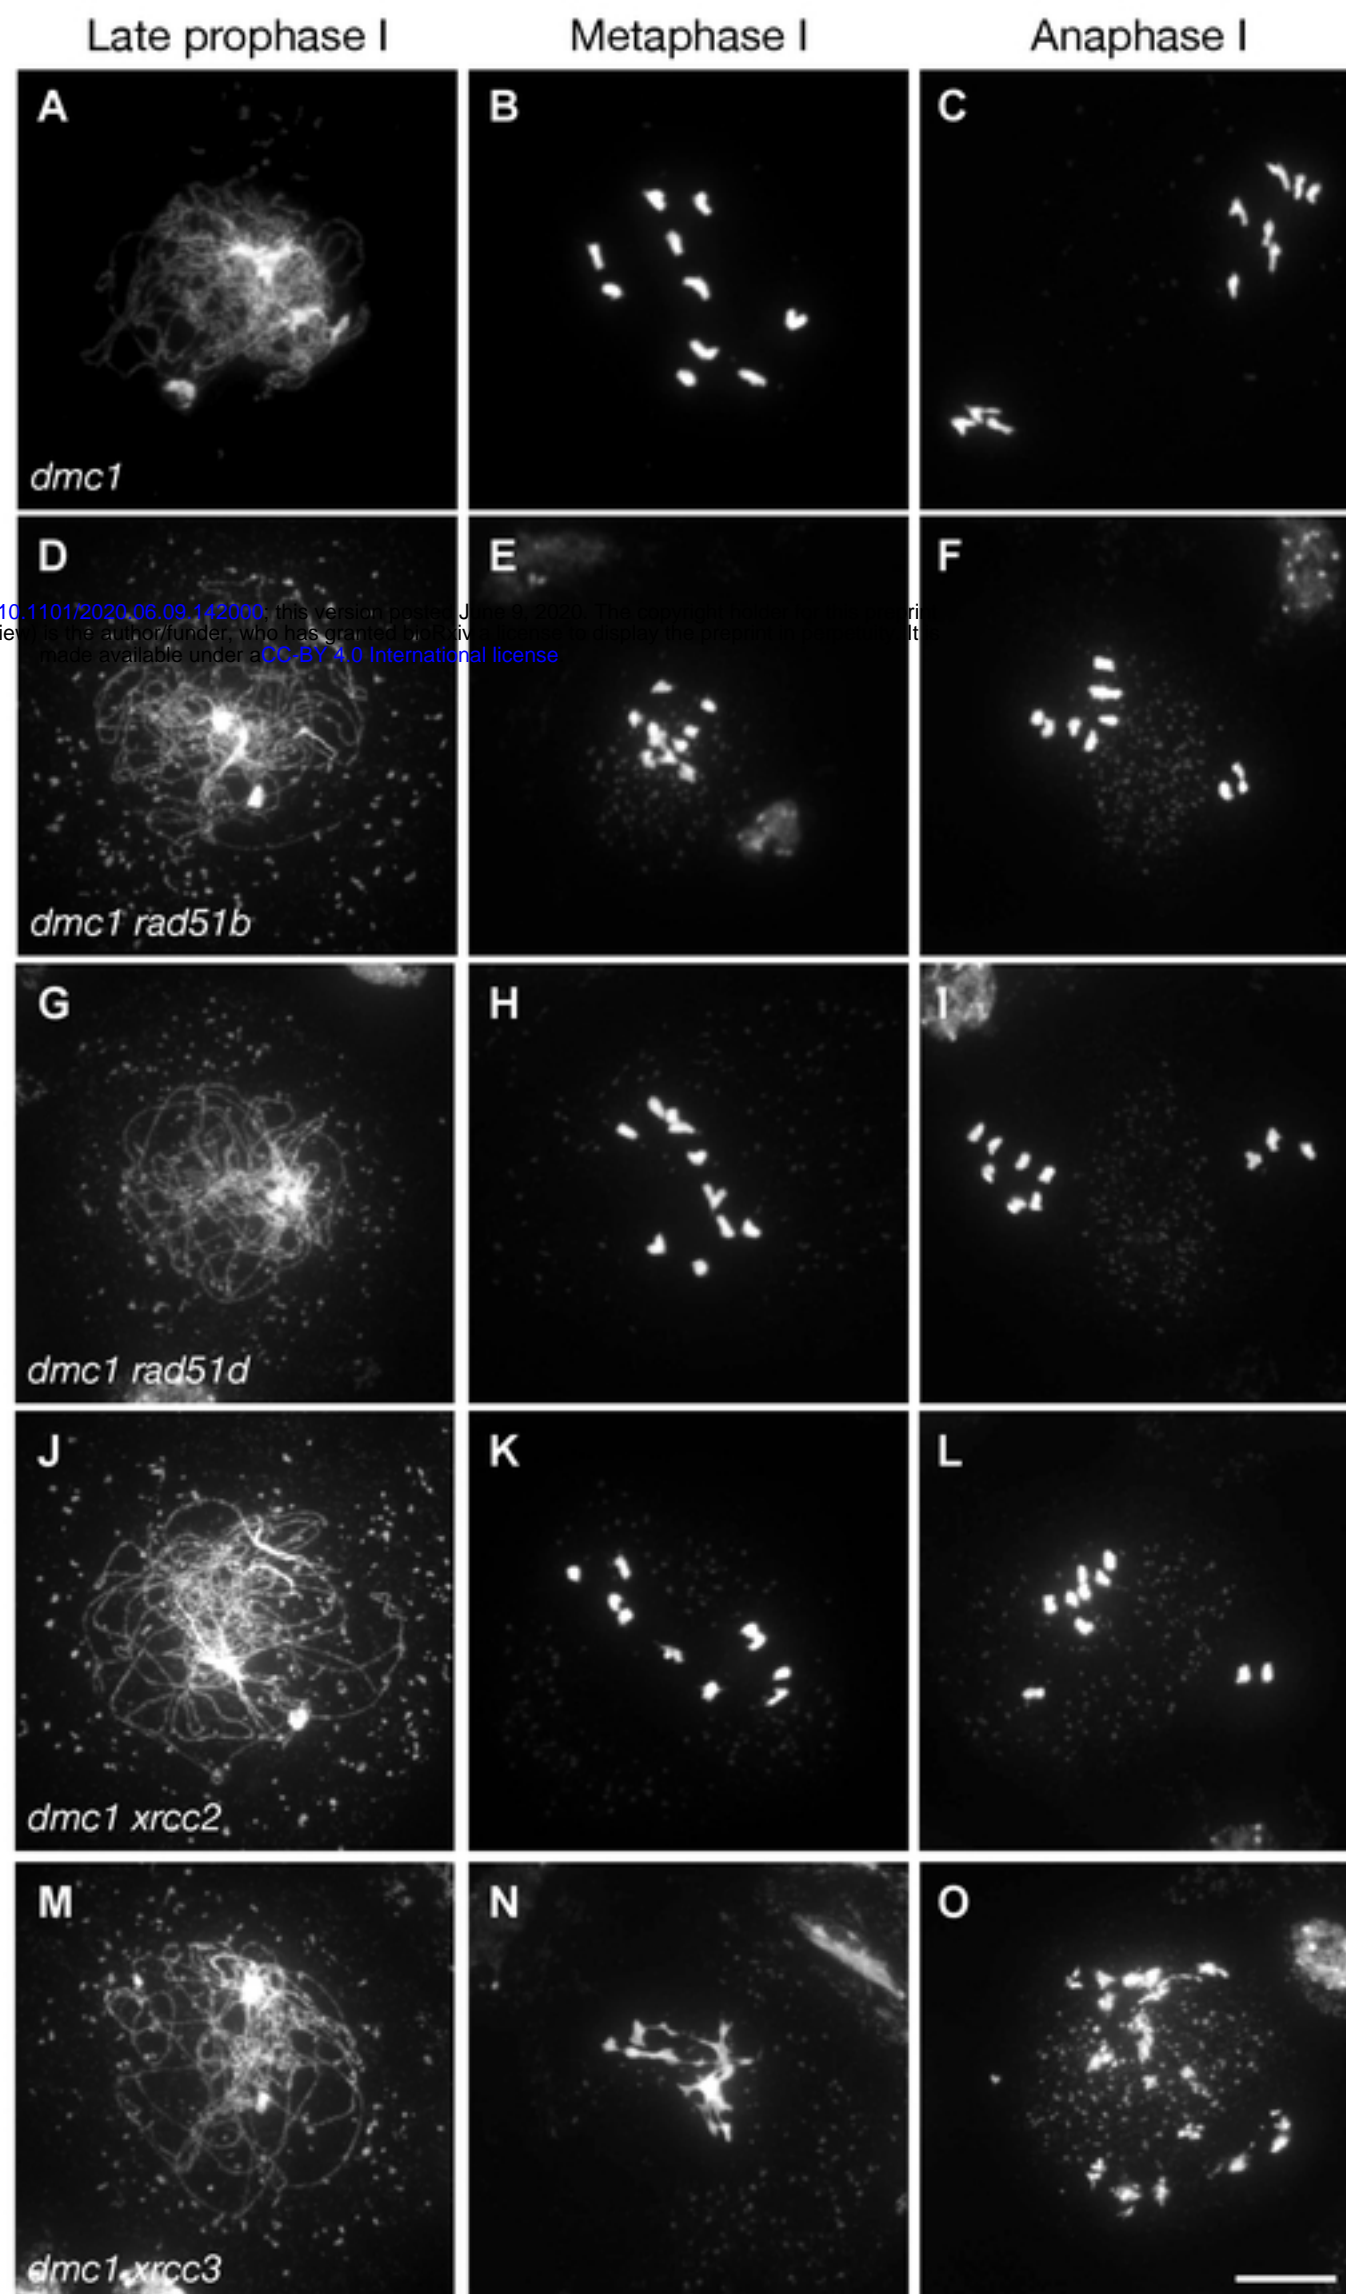

bioRxiv preprint doi: <https://doi.org/10.1101/2020.06.09.142000>; this version posted June 9, 2020. The copyright holder for this preprint (which was not certified by peer review) is the author/funder, who has granted bioRxiv a license to display the preprint in perpetuity. It is made available under aCC-BY 4.0 International license.

Figure 6
